# Supplementary material for: Introduction and adoption of innovative invasive procedures and devices in the NHS: an in-depth analysis of written policies and qualitative interviews (the INTRODUCE study protocol)
Source: PubMed Central journal article supplement (PMC6719760; doi:10.1136/bmjopen-2019-029963), 2019-08-26
Supplement: bmjopen-2019-029963.draft_revisions.pdf [file bmjopen-2019-029963.draft_revisions.pdf]

# BMJ Open

BMJ Open is committed to open peer review. As part of this commitment we make the peer review history of every article we publish publicly available.

When an article is published we post the peer reviewers' comments and the authors' responses online. We also post the versions of the paper that were used during peer review. These are the versions that the peer review comments apply to.

The versions of the paper that follow are the versions that were submitted during the peer review process. They are not the versions of record or the final published versions. They should not be cited or distributed as the published version of this manuscript.

BMJ Open is an open access journal and the full, final, typeset and author-corrected version of record of the manuscript is available on our site with no access controls, subscription charges or pay-per-view fees (<http://bmjopen.bmj.com>).

If you have any questions on BMJ Open's open peer review process please email [info.bmjopen@bmj.com](mailto:info.bmjopen@bmj.com)

# BMJ Open

## An investigation into NHS policy and practice for the introduction and adoption of innovative invasive procedures and devices: the INTRODUCE study protocol

|                               |                                                                                                                                                                                                                                                                                                                                                                                                                                                                                                                                                                                                                                                                                                                                                                                                                                                                                                                                                                                                                                                                                                                                                                                                    |
|-------------------------------|----------------------------------------------------------------------------------------------------------------------------------------------------------------------------------------------------------------------------------------------------------------------------------------------------------------------------------------------------------------------------------------------------------------------------------------------------------------------------------------------------------------------------------------------------------------------------------------------------------------------------------------------------------------------------------------------------------------------------------------------------------------------------------------------------------------------------------------------------------------------------------------------------------------------------------------------------------------------------------------------------------------------------------------------------------------------------------------------------------------------------------------------------------------------------------------------------|
| Journal:                      | <i>BMJ Open</i>                                                                                                                                                                                                                                                                                                                                                                                                                                                                                                                                                                                                                                                                                                                                                                                                                                                                                                                                                                                                                                                                                                                                                                                    |
| Manuscript ID                 | bmjopen-2019-029963                                                                                                                                                                                                                                                                                                                                                                                                                                                                                                                                                                                                                                                                                                                                                                                                                                                                                                                                                                                                                                                                                                                                                                                |
| Article Type:                 | Protocol                                                                                                                                                                                                                                                                                                                                                                                                                                                                                                                                                                                                                                                                                                                                                                                                                                                                                                                                                                                                                                                                                                                                                                                           |
| Date Submitted by the Author: | 19-Feb-2019                                                                                                                                                                                                                                                                                                                                                                                                                                                                                                                                                                                                                                                                                                                                                                                                                                                                                                                                                                                                                                                                                                                                                                                        |
| Complete List of Authors:     | Cousins, Sian; University of Bristol, Population Health Sciences<br>Richards, Hollie; University of Bristol, Population Health Sciences<br>Zahra, Jesmond; University of Bristol, Population Health Sciences<br>Elliott, Daisy; University of Bristol, Population Health Sciences<br>Avery, Kerry; University of Bristol, Population Health Sciences<br>Robertson, Harry; University of Bristol, Population Health Sciences<br>Paramasivan, Sangeetha ; University of Bristol, Population Health Sciences<br>Wilson, Nicholas; University of Bristol, Population Health Sciences<br>Mathews, Johnny; University of Bristol, Population Health Sciences<br>Tolkien, Zoe; University of Bristol, Population Health Sciences<br>Main, Barry; University of Bristol, Population Health Sciences; University Hospitals Bristol NHS Foundation Trust<br>Blencowe, Natalie; University of Bristol, Population Health Sciences; University Hospitals Bristol NHS Foundation Trust<br>Hinchliffe, Robert; University of Bristol, Population Health Sciences; North Bristol NHS Trust<br>Blazeby, Jane; University of Bristol, Population Health Sciences; University Hospitals Bristol NHS Foundation Trust |
| Keywords:                     | SURGERY, innovation, NHS, Clinical governance < HEALTH SERVICES ADMINISTRATION & MANAGEMENT                                                                                                                                                                                                                                                                                                                                                                                                                                                                                                                                                                                                                                                                                                                                                                                                                                                                                                                                                                                                                                                                                                        |
|                               |                                                                                                                                                                                                                                                                                                                                                                                                                                                                                                                                                                                                                                                                                                                                                                                                                                                                                                                                                                                                                                                                                                                                                                                                    |

SCHOLARONE™  
Manuscripts

1  
2  
3 **An investigation into NHS policy and practice for the introduction and adoption of innovative**  
4  
5 **invasive procedures and devices: the INTRODUCE study protocol**  
6  
7

8 **Cousins S,<sup>1</sup> Richards HS,<sup>1</sup> Zahra J,<sup>1</sup> Elliott D,<sup>1</sup> Avery KNL,<sup>1</sup> Robertson HF,<sup>1</sup> Paramasivan S,<sup>1</sup> Wilson N,<sup>1</sup>**  
9  
10 **Mathews JA,<sup>1</sup> Tolkien Z,<sup>1</sup> Main BG,<sup>1,2</sup> Blencowe NS,<sup>1,2</sup> Hinchliffe R,<sup>1,3</sup> Blazeby JM<sup>1,2</sup>**  
11

12 <sup>1</sup>National Institute for Health Research Bristol Biomedical Research Centre Surgical Innovation  
13  
14 Theme and the Medical Research Council ConDuCT-II (Collaboration and innovation in Difficult and  
15  
16 Complex randomised controlled Trials In Invasive procedures) Hub for Trials Methodology Research,  
17  
18 Centre for Surgical Research, Population Health Sciences, Bristol Medical School, University of  
19  
20 Bristol, 39 Whatley Road, Clifton, Bristol, UK. BS8 2PS;  
21  
22

23  
24 <sup>2</sup>University Hospitals Bristol NHS Foundation Trust, Bristol, UK. BS2 8HW  
25

26 <sup>3</sup>North Bristol NHS Trust, Bristol, UK. BS10 5NB  
27  
28  
29  
30  
31  
32  
33  
34  
35

36 **Corresponding author:** Sian Cousins, [Sian.cousins@bristol.ac.uk](mailto:Sian.cousins@bristol.ac.uk)  
37  
38

39 **Word count: 3094 (4000 max)**  
40  
41  
42  
43  
44  
45  
46  
47  
48  
49  
50  
51  
52  
53  
54  
55  
56  
57  
58  
59  
60

## **Abstract**

### **Introduction**

Innovation is key to improving outcomes in healthcare. Innovative pharmaceutical products undergo rigorous phased research evaluation before they are introduced into practice. The introduction of innovative invasive procedures and devices is much less rigorous and phased research, including randomised controlled trials, is not always undertaken. Whilst the innovator (usually a surgeon) may introduce a new or modified procedure/device within the context of formal research, they may also be introduced by applying for local NHS organisation approval alone. Written policies for the introduction of new procedures and/or devices often form part of this local clinical governance infrastructure; however, little is known about their content or use in practice.

This study aims to systematically investigate how new invasive procedures and devices are introduced in NHS England and Wales.

### **Methods and analysis**

An in-depth analysis of written policies will be undertaken. This will be supplemented with interviews with key stakeholders.

All acute NHS trusts in England and Health Boards in Wales will be systematically approached and asked to provide written policies for the introduction of new invasive procedures and devices.

Information on the following will be captured: I) policy scope, including when new procedures should be introduced within a formal research framework; II) requirements for patient information provision; III) outcome reporting and/or monitoring. Data will be extracted using a standardised form developed iteratively within the study team.

Semi-structured interviews with medical directors, audit and governance leads, and surgeons will explore views regarding the introduction of new invasive procedures into practice, including knowledge of and implementation of current policies.

## **Ethics and dissemination**

In-depth analysis of written policies does not require ethics approval. The University of Bristol Ethics Committee (56522) approved the interview component of the study. Findings from this work will be presented at appropriate conferences and will be published in peer-reviewed journals.

## **Article summary**

### **Strengths and limitations of this study**

- This is the first systematic study addressing how the NHS introduces innovative invasive procedures into clinical practice; a topic of international public, professional and political interest given the wealth of historic and recent examples of patient harm caused by lack of regulation.
- The study combines analysis of written policies and interviews with key stakeholders to ensure an in-depth exploration of the topic to inform national guidance to improve and standardise the introduction of innovative invasive procedures and devices.
- The degree to which policies are actually adhered to across local NHS organisations is not systematically explored in the current study and is recommended for future research.

## **Introduction**

Invasive procedures are a fundamental part of healthcare and can include surgical operations with and without devices, as well as endoscopic and radiologically guided interventions. At least 230 million invasive procedures are delivered worldwide,<sup>1</sup> with 12.5 million undertaken in the United Kingdom (UK) annually.<sup>2</sup> This number is likely to increase with continued innovation, including the advent of new technologies and minimal access procedures.

Innovation in invasive procedures is key. It may include modifying existing techniques,<sup>3</sup> to performing completely new first-in-human invasive procedures.<sup>4</sup> Whilst innovation is common, the governance surrounding it is not standardised and is currently under much scrutiny.<sup>5-7</sup> A recent

1  
2  
3 inquest into the death of a patient following robot-assisted cardiac surgery, a procedure that had  
4 not been previously performed in the UK, found insufficient governance surrounding the  
5 introduction of this innovative procedure.<sup>6</sup> Recommendations from the Coroner, echoed by a  
6 statement from RCS,<sup>8</sup> included introducing stricter governance relating to the use of new  
7 technologies and procedures, specific measures to assess the competence and training received by  
8 clinicians wishing to undertake them, and detailed patient information provision regarding the risks  
9 associated with new procedures.

10  
11  
12 Innovation in invasive procedures may be introduced under the auspices of formal research studies,  
13 with a protocol and application for ethical approval. However, multiple reviews show that ethical  
14 approval is rarely gained when delivering innovative invasive procedures.<sup>9-12</sup> While medical devices  
15 to be used inside the body require a European Conformity (CE) mark<sup>13-15</sup> prior to use, the evidence  
16 required to gain this certification does not often come from high-quality randomised controlled trials  
17 and post-marketing surveillance is minimal.<sup>7</sup> This is very different from the tightly governed and  
18 transparent developmental pathways required for the introduction of new pharmaceutical  
19 procedures.<sup>16</sup>

20  
21  
22 Outside of research, innovative invasive procedures and devices may be introduced via local hospital  
23 policies. The UK National Institute for Clinical Excellence (NICE), which is responsible for improving  
24 health and social care in the NHS through evidence-based guidance, recommends that local NHS  
25 organisations (e.g. NHS trusts in England and health boards in Wales) have appropriate governance  
26 structures in place to review, authorise and monitor the introduction of new invasive procedures.<sup>17</sup>

27  
28  
29 In addition, NICE recommends the approval of new invasive procedures that do not have existing  
30 NICE guidance should only be given if appropriate training of those delivering the procedure is  
31 demonstrated, patients are made aware of the new status of the procedures, and there are  
32 proposed arrangements for clinical audit.<sup>18</sup> These recommendations are echoed by organisations  
33 worldwide.<sup>19-21</sup> In the UK, it is the responsibility of local hospital organisations to implement this  
34  
35  
36  
37  
38  
39  
40  
41  
42  
43  
44  
45  
46  
47  
48  
49  
50  
51  
52  
53  
54  
55  
56  
57  
58  
59  
60

1  
2  
3 guidance, although the extent to which this occurs is unknown, and there are instances where  
4  
5 innovative procedures are introduced into practice without any formal governance.<sup>6</sup> Furthermore,  
6  
7 where local policies do exist, little is known about their content or how they are used in practice;  
8  
9 how trusts define a new procedure (i.e. when the guidance should be applied), what information  
10  
11 should be given to patients, and how outcomes of new procedures are recorded and monitored is  
12  
13 unclear.  
14  
15

16  
17 A systematic literature review conducted by the Australian Safety and Efficacy Register of New  
18  
19 Interventional Procedures-Surgical<sup>22</sup> identified only six publications related to how acute healthcare  
20  
21 organisations introduce new invasive procedures. These included retrospective case-reports of new  
22  
23 procedures being introduced in individual hospitals in the UK<sup>23</sup> and Australia,<sup>24</sup> and case studies of  
24  
25 qualitative interviews with surgeons and clinicians at hospitals in Canada regarding how decisions to  
26  
27 introduce new technologies were made.<sup>25, 26</sup> Findings indicated that the introduction of new  
28  
29 procedures and technologies were based predominantly on surgeons' perceptions that such  
30  
31 innovations would improve patient outcomes, safety and care, with no structured decision-making  
32  
33 process in place at an institutional/governance level. To date, there has been no comprehensive  
34  
35 review of current local NHS policies, many of which are inaccessible by traditional literature  
36  
37 systematic searches used in the above review.  
38  
39  
40

41  
42 **Aim:** To undertake an in-depth analysis of local NHS policies for the introduction of new invasive  
43  
44 procedures and devices to establish: I) how policies outline scope for their use, including how they  
45  
46 define which invasive procedures and devices are eligible under their remit (e.g. new or modified)  
47  
48 and guidance given about when research approvals should be sought, II) recommendations for  
49  
50 patient information provision, III) processes for monitoring and reporting outcomes of innovative  
51  
52 procedures and devices, including how decision-making regarding adoption or stopping of the  
53  
54 procedure or device are made.  
55  
56  
57

### 58 **Methods and analysis**

59  
60

1  
2  
3 This work will comprise two parts occurring concurrently and iteratively - 1) Systematic analysis of  
4 written local NHS policies for the introduction of new invasive procedures and devices; 2) Interviews  
5  
6 with key stakeholders (e.g. medical directors, audit and governance leads, and surgeons) regarding  
7  
8 surgical innovation in practice, including knowledge of and implementation of current policies.  
9  
10  
11  
12

### 13 **1. Systematic analysis of NHS policies for the introduction of new invasive procedures and** 14 15 **devices**

#### 16 17 18 ***Sampling and data collection***

19  
20 All acute NHS trusts in England (n=150) and NHS Health Boards in Wales (n=7)<sup>27</sup> will be  
21  
22 systematically approached. Initially, online searches will be performed to determine if policies for  
23  
24 the introduction of new invasive procedures and/or devices into clinical practice are available online.  
25  
26 Where policies are not available, local NHS organisations will be approached as follows. Medical  
27  
28 Directors will be emailed by JMB or RH to request copies of written policies. Non-responders to the  
29  
30 initial email will have one email reminder two weeks later and will then be approached by email and  
31  
32 phone by a senior research associate and a research fellow. Trusts/health boards not responding to  
33  
34 this will have one final email from the original project lead. Policies not wholly related to the  
35  
36 introduction of new invasive procedures and/or devices will be excluded (e.g. device management  
37  
38 policies, National or Local Safety Standards for Invasive Procedures (NatSSIPs, LocSSIPs)). Invasive  
39  
40 procedures will be defined as procedures where access is gained via an incision, natural orifice or  
41  
42 percutaneous puncture or involving devices used inside the body.  
43  
44  
45  
46  
47

48 Trust/health board demographics, including geographical area and acute trust type (England only,  
49  
50 e.g. small, specialist, teaching, foundation status) will be collected.<sup>27</sup>  
51  
52

#### 53 ***Data extraction from trust policies***

54  
55  
56  
57  
58  
59  
60



1  
2  
3 A data extraction form will be developed using a priori themes drawn from the literature and  
4  
5 knowledge of the area amongst team members, and themes that inductively emerge from the initial  
6  
7 coding of a subset of documents independently by two researchers.  
8  
9

10 The form will be piloted on a sample of policies gathered during scoping work until the team is  
11  
12 satisfied that it fully captures all initial key themes. The finalised form will be converted into an  
13  
14 electronic database<sup>28</sup> where data will be inputted directly from written policies. All policy  
15  
16 documents, including addendums, will be systematically examined. Ten percent of policies will be  
17  
18 randomly selected for double independent data extraction to maximise reliability of data extraction.  
19  
20 Where there are discrepancies these will be resolved through consensus and where this is not  
21  
22 achieved a third independent reviewer will be consulted.  
23  
24  
25

26 Data will be extracted about, I) policy scope, II) patient information provision and consent, and III)  
27  
28 outcome monitoring and decision making (detailed below). For each policy we will also extract  
29  
30 details of policy title and date, date of last policy review and date of next policy review. In addition, if  
31  
32 a formal committee is named in the policy as being involved in reviewing the introduction of a new  
33  
34 procedure, we will collect data on the title of the committee, committee chair, core members, and  
35  
36 frequency of meetings.  
37  
38  
39

#### 40 41 *I) Policy scope* 42

43  
44 How policies define which invasive procedures and devices are eligible under their remit (e.g.  
45  
46 policy definitions of new procedures) and guidance regarding how to decide whether the new  
47  
48 invasive procedure/device requires 'research approvals', in addition to or instead of local policy  
49  
50 approvals alone, will be captured. Policy scope data will not be used to inform inclusion or  
51  
52 exclusion of policies from analysis.  
53  
54

#### 55 56 *II) Patient information provision and consent* 57 58 59 60

1  
2  
3 Guidance about specific consent procedures and how patients should be informed when a  
4 procedure is new, modified or being conducted by a clinician/in a trust for the first time will be  
5 captured. Specific requirements relating to Patient Information Leaflets (PILs), the submission of  
6 these PILs to the trust for evaluation and any processes in place to monitor adherence to  
7 guidance regarding patient information will also be extracted.  
8  
9  
10  
11  
12  
13  
14

### 15 *III) Outcome monitoring and decision making*

16  
17 In addition to outcomes typically associated with clinical effectiveness studies, outcomes of  
18 specific relevance to evaluating innovation of invasive procedures and devices will be extracted;  
19 these may include operator experiences, intended function (e.g. benefit) of the new/modified  
20 procedure/device, unanticipated harms, and failure and/or abandonment of the  
21 procedure/device. Mechanisms proposed for outcome monitoring (e.g. registered audit,  
22 feedback to the committee) will be captured, in addition to guidance for decision-making  
23 regarding when procedures should be introduced into routine clinical practice or abandoned, and  
24 recommendations for wider reporting.  
25  
26  
27  
28  
29  
30  
31  
32  
33  
34  
35

### 36 ***Data analyses (systematic analysis of NHS trust policies)***

37  
38 In order to gain an overview of the scope of the policies and develop an in-depth understanding of  
39 specific themes of relevance to the study aims, mixed methods analyses will be undertaken.  
40  
41  
42  
43

44 Trust/health board demographics, including geographical area and acute trust type will be tabulated.  
45  
46 Quantitative data including response rates, and the presence or absence of a new invasive  
47 procedures/devices policy within each local NHS organisation will be presented.  
48  
49  
50  
51

52 Data related to each of the three key data extraction areas outlined above will be tabulated and  
53 descriptive statistics provided. For example, the number of policies that provide guidance for when  
54 procedures should only be conducted within a research study will be counted.  
55  
56  
57  
58  
59  
60

1  
2  
3 Free text data related to each of the three data extraction areas will be extracted from policies and  
4 analysed as following. Verbatim sections of policies will be transferred to qualitative data analysis  
5 software (NVivo, version 11) and analysed thematically in several key stages: I) two researchers will  
6 independently code a subset of policy documents to develop a preliminary coding frame, II) any  
7 discrepancies will be resolved through discussion before the coding frame is applied to the full  
8 dataset, III) codes will be grouped into themes and subthemes by examining commonalities,  
9 differences and relationships in the data, IV) themes will be regularly reviewed to ensure they  
10 accurately encapsulate the data. Findings from this qualitative analysis will be written up  
11 descriptively.  
12  
13  
14  
15  
16  
17  
18  
19  
20  
21  
22

## 23 **2. Interviews with key stakeholders**

24  
25 In-depth semi-structured interviews will be conducted with representatives from key stakeholder  
26 groups as detailed below.  
27  
28  
29  
30  
31

### 32 ***Recruitment and sampling***

33  
34 Professionals involved in local governance processes related to the introduction of new procedures  
35 and devices (e.g. new procedures committee members, medical directors) and healthcare  
36 professionals with experience of introducing new/modified procedures or devices into clinical  
37 practice (e.g. surgeons, nurses) will be identified from policy documents, trust websites and clinical  
38 contacts of the research team. A snowball sampling approach,<sup>29</sup> whereby interviewees are asked to  
39 recommend the names of other potential interviewees, will be used to facilitate recruitment. To  
40 ensure maximum variation within the sample,<sup>29</sup> we will interview participants from varying  
41 geographical locations, trust types, different surgical specialities and from trusts with and without  
42 policies. Participant characteristics will be reviewed as recruitment and analyses are ongoing  
43 throughout the study, and underrepresented groups or individuals with particular knowledge and/or  
44 experiences of particular interest will be purposively sampled.<sup>29</sup> It is anticipated that up to 60  
45  
46  
47  
48  
49  
50  
51  
52  
53  
54  
55  
56  
57  
58  
59  
60

1  
2  
3 stakeholders will be interviewed, although data analysis will be driven by the objective of achieving  
4 data saturation (whereby no new themes emerge from the data).  
5  
6

### 7 8 **Data collection** 9

10  
11 Written informed consent will be obtained from all participants before interviews commence.

12  
13 Interviews will be conducted by one of two experienced qualitative researchers, either via telephone  
14 or in person, at times convenient for participants. Interviews will be audio-recorded using encrypted  
15 audio-recording devices. Discussions will follow a topic guide that will vary by stakeholder group so  
16 that key issues are covered, while ensuring participants are able to talk about new issues they feel  
17 are important. Topic guides will be adapted iteratively as analyses of interviews and written policies  
18 progresses so that any emerging issues can be discussed with subsequent participants.  
19  
20  
21  
22  
23  
24  
25

26  
27 Interviews with professionals involved in governance processes will specifically explore how new  
28 procedures are introduced. This will include how policies define the types of technologies and  
29 procedures that will be reviewed for introduction to the trust (with examples if possible); the  
30 approval processes in place; methods for follow up, monitoring of approved  
31 technologies/procedures and abandonment of procedures. Interviews with healthcare professionals  
32 will explore their views on surgical innovation, monitoring of new procedures/devices and, when  
33 applicable, their experience of introducing a new procedure or device into clinical practice.  
34  
35  
36  
37  
38  
39  
40  
41  
42  
43

### 44 **Analysis (interviews with key stakeholders)** 45

46  
47 Interviews will be transcribed in full and verbatim, checked against the original recording for  
48 accuracy, and imported into NVivo (version 11). Data will then be systematically assigned codes and  
49 analysed thematically using constant comparative techniques.<sup>30</sup> A subset of the transcripts will be  
50 doubled coded by a second qualitative researcher, with any discrepancies in coding discussed and  
51 resolved. Data collection and analysis will proceed in parallel, with emerging findings informing  
52 further sampling (theoretical sampling) and data collection. Dissonant views that challenge the  
53  
54  
55  
56  
57  
58  
59  
60

1  
2  
3 emerging dominant perspectives will be actively pursued (negative case analysis) to ensure the  
4  
5 inclusion of diverse viewpoints.  
6  
7

### 8 **Data protection and confidentiality**

9  
10 All data relating to participants' personal identities will be anonymised using unique study  
11  
12 identifiers. This data will be stored in a separate encrypted file, in a separate location from the study  
13  
14 data on the University of Bristol server. It will only be accessible to the research team and used only  
15  
16 in the event of re-contacting study participants to verify information, e.g. quotes. Verbatim  
17  
18 quotations that may be used for publications or presentations will also be anonymised.  
19  
20  
21  
22

### 23 **Ethics and dissemination**

24  
25 The in-depth analysis of written policies does not require ethics approval, in accordance with the  
26  
27 HRA definition of research.<sup>31</sup> The qualitative component of the work has been approved by the  
28  
29 University of Bristol Ethics Committee (reference 56522).  
30  
31  
32

### 33 **Expected outcomes of the study**

34  
35 This work will provide an in-depth exploration and summary of current governance procedures for  
36  
37 clinicians wishing to introduce innovative invasive procedures and devices into NHS practice in  
38  
39 England and Wales. Understanding how innovative invasive procedures are introduced will inform  
40  
41 the development of standardised guidance and raise hypotheses for future research. It is expected  
42  
43 that this work will inform national guidelines regarding the introduction of innovative invasive  
44  
45 procedures.  
46  
47  
48  
49

### 50 **Dissemination**

51  
52 Findings from this work will be presented at appropriate conferences and published across several  
53  
54 papers highlighting main findings. These will include in-depth analyses of the scope of written  
55  
56 policies, including when innovative procedures should be delivered within a research governance  
57  
58 framework, and how policies define 'new' and 'modified' procedures/devices. Additional  
59  
60

1  
2  
3 publications will focus on guidance related to patient information, consent and outcome monitoring  
4  
5 after the introduction of new procedures and devices. Additionally, qualitative data from interviews  
6  
7 with key stakeholders regarding surgical innovation in practice, including knowledge and  
8  
9 implementation of current policies will be published separately.  
10  
11

### 12 **Discussion**

13  
14  
15 Currently little is known about the ways in which new invasive procedures and devices are  
16  
17 introduced into NHS clinical practice outside the context of research. This is a topical issue as several  
18  
19 concerning and problematic high-profile cases have emerged recently.<sup>5-7, 32</sup> This study will  
20  
21 systematically study current NHS practice to determine the presence, content and implementation  
22  
23 of policies relating to the introduction of new invasive procedures and devices in NHS England and  
24  
25 Wales. Identified policies will be scrutinised to determine what guidance is given regarding policy  
26  
27 scope, patient information provision and the monitoring, reporting and review of outcomes.  
28  
29

30  
31 Additionally, interviews with stakeholders (such as surgeons and members of new procedures  
32  
33 committees) will further inform this work.  
34  
35

36  
37 The ways in which new procedures, including surgery, are introduced into practice is a topic of  
38  
39 international public interest. This study is the first of its kind and it is anticipated it will inform future  
40  
41 NHS governance and practice in this field.  
42  
43

### 44 **Patient and public involvement**

45  
46  
47 The current study comprises a core component of the work undertaken within the National Institute  
48  
49 for Health Research (NIHR) Bristol Biomedical Research Centre (BRC) Surgical Innovation theme,  
50  
51 which aims to improve the safe and transparent translation of innovative procedures/devices to  
52  
53 clinical practice. A patient and public involvement (PPI) group has been established as part of the  
54  
55 NIHR Bristol BRC, where patients who have undergone surgery are asked about their views regarding  
56  
57 how new surgical procedures are undertaken in NHS clinical practice. This involves discussion around  
58  
59  
60

1  
2  
3 what information patients would like to be provided with before and after receiving a new invasive  
4 procedure/device, and what health/lifestyle outcomes after surgery would be considered important.  
5  
6

7 To date the consensus between PPI group members is that the work being undertaken to improve  
8 the way in which new procedures are introduced into clinical practice is important and could have  
9 positive implications for future health care in the NHS. The current study comprises a first step in  
10 the process of improving how new procedures are introduced into practice and the PPI group will  
11 continue to provide input throughout the study and future work to develop related guidance and  
12 disseminate findings.  
13  
14  
15  
16  
17  
18  
19  
20  
21

### **Authors' contributions**

22 All authors contributed to the development of the idea and drafting and revision of the manuscript.  
23  
24 JMB is the lead of the NIHR Bristol Biomedical Research Centre Surgical Innovation theme and  
25 formed the methodological ideas to understand surgical innovation with contributions from SC, HR,  
26 JZ, DE, KA, SP, NW, BGM, NSB, RH. All authors gave approval for the manuscript to be submitted.  
27  
28  
29  
30  
31  
32  
33

### **Funding statement**

34 This study was supported by the NIHR Biomedical Research Centre at University Hospitals Bristol  
35 NHS Foundation Trust and the University of Bristol, the MRC ConDuCT-II (Collaboration and  
36 innovation for Difficult and Complex randomised controlled Trials In Invasive procedures) Hub for  
37 Trials Methodology Research (MR/K025643/1) ([www.bristol.ac.uk/population-health-](http://www.bristol.ac.uk/population-health-sciences/centres/conduct2)  
38 [sciences/centres/conduct2](http://www.bristol.ac.uk/population-health-sciences/centres/conduct2)) and a NIHR senior investigator award (NF-SI-0514-10114). The views  
39 expressed in this publication are those of the author(s) and not necessarily those of the NHS, the  
40 National Institute for Health Research, the Department of Health and Social Care or the MRC.  
41  
42  
43  
44  
45  
46  
47  
48  
49  
50  
51  
52

### **Competing interests statement**

53  
54  
55  
56 None declared  
57  
58

### **References**

1. Weiser TG, Regenbogen SE, Thompson KD, et al. An estimation of the global volume of surgery: a modelling strategy based on available data. *Lancet* 2008;372(9633):139-44. doi: 10.1016/S0140-6736(08)60878-8 [published Online First: 2008/06/28]
2. Abbott TEF, Fowler AJ, Dobbs TD, et al. Frequency of surgical treatment and related hospital procedures in the UK: a national ecological study using hospital episode statistics. *Br J Anaesth* 2017;119(2):249-57. doi: 10.1093/bja/aex137 [published Online First: 2017/09/01]
3. Poelman M, Apers J, van den Brand H, et al. The INCH-Trial: a multicentre randomized controlled trial comparing the efficacy of conventional open surgery and laparoscopic surgery for incisional hernia repair. *BMC surgery* 2013;13:18-18. doi: 10.1186/1471-2482-13-18
4. Edwards TL, Xue K, Meenink HCM, et al. First-in-human study of the safety and viability of intraocular robotic surgery. *Nat Biomed Eng* 2018;2:649-56. doi: 10.1038/s41551-018-0248-4 [published Online First: 2018/09/29]
5. Cohen D. How a fake hip showed up failings in European device regulation. *BMJ* 2012;345:e7090. doi: 10.1136/bmj.e7090 %J
6. Dyer C. Robot assisted surgery is blamed for heart patient's death. *BMJ* 2018;363:k4791. doi: 10.1136/bmj.k4791 %J
7. Heneghan C, Aronson JK, Goldacre B, et al. Transvaginal mesh failure: lessons for regulation of implantable devices. *BMJ* 2017;359:j5515. doi: 10.1136/bmj.j5515 [published Online First: 2017/12/09]
8. Royal College of Surgeons. RCS statement on need for national guidelines on the introduction of new procedures and technologies 2018 [Available from: <https://www.rcseng.ac.uk/news-and-events/media-centre/press-releases/robotic-surgery-guidelines/> accessed November 2018]
9. Blencowe NS, Chana P, Whistance RN, et al. Outcome reporting in neoadjuvant surgical trials: a systematic review of the literature and proposals for new standards. *J Natl Cancer Inst* 2014;106(9) doi: 10.1093/jnci/dju217 [published Online First: 2014/08/12]
10. Blencowe NS, McNair AG, Davis CR, et al. Standards of outcome reporting in surgical oncology: a case study in esophageal cancer. *Ann Surg Oncol* 2012;19(13):4012-8. doi: 10.1245/s10434-012-2497-x [published Online First: 2012/07/24]
11. Currie A, Brigid A, Blencowe NS, et al. Systematic review of surgical innovation reporting in laparoendoscopic colonic polyp resection. *Br J Surg* 2015;102(2):e108-16. doi: 10.1002/bjs.9675 [published Online First: 2015/01/30]
12. Whistance RN, Forsythe RO, McNair AG, et al. A systematic review of outcome reporting in colorectal cancer surgery. *Colorectal Dis* 2013;15(10):e548-60. doi: 10.1111/codi.12378 [published Online First: 2013/08/10]
13. Directive 2000/70/EC of the European Parliament and of the Council of 16 November 2000 amending Council Directive 93/42/EEC as regards medical devices incorporating stable derivatives of human blood or human plasma [Available from: <https://eur-lex.europa.eu/legal-content/en/TXT/?uri=CELEX:32000L0070> accessed December 2018]
14. Council Directive 90/385/EEC of 20 June 1990 on the approximation of the laws of the Member States relating to active implantable medical devices 1990;189(20/07):0017-36.
15. Kramer DB, Xu S, Kesselheim AS. Regulation of medical devices in the United States and European Union: Mass Medical Soc, 2012.
16. Legislation.gov.uk. The Human Medicines Regulations 2012 2012 [Available from: <http://www.legislation.gov.uk/ukxi/2012/1916/regulation/8/made> accessed February 2018]
17. National Institute for Health and Care Excellence. Interventional procedures guidance 2003 [Available from: <https://www.nice.org.uk/about/what-we-do/our-programmes/nice-guidance/nice-interventional-procedures-guidance> accessed February 2018]
18. Department of Health. Health Service Circular (HSC2003/011) – The Interventional Procedures Programme 2003 [Available from: <https://webarchive.nationalarchives.gov.uk/20120503190439/http://www.dh.gov.uk/prod>



- 1  
2  
3 [consum\\_dh/groups/dh\\_digitalassets/@dh/@en/documents/digitalasset/dh\\_4064925.pdf](https://consum.dh/groups/dh_digitalassets/@dh/@en/documents/digitalasset/dh_4064925.pdf)  
4 accessed February 2018]
- 5 19. Biffi WL, Spain DA, Reitsma AM, et al. Responsible development and application of surgical  
6 innovations: a position statement of the Society of University Surgeons. *JACS*  
7 2008;206(6):1204-09.
- 8 20. Stefanidis D, Fanelli RD, Price R, et al. SAGES guidelines for the introduction of new technology  
9 and techniques. *Surg Endosc* 2014;28(8):2257-71. doi: 10.1007/s00464-014-3587-6  
10 [published Online First: 2014/06/19]
- 11 21. Royal College of Surgeons. Good Surgical Practice - Introduction of new techniques 2014  
12 [Available from: [https://www.rcseng.ac.uk/standards-and-research/gsp/domain-1/1-2-4-](https://www.rcseng.ac.uk/standards-and-research/gsp/domain-1/1-2-4-introduction-of-new-techniques/)  
13 [introduction-of-new-techniques/](https://www.rcseng.ac.uk/standards-and-research/gsp/domain-1/1-2-4-introduction-of-new-techniques/) accessed February 2018]
- 14 22. Thavaneswaran P, Maddern G, Spigelman A, et al. A review of policies and processes for the  
15 introduction of new interventional procedures. ASERNIP-S Report No. 58. Adelaide, South  
16 Australia: ASERNIP, 2007.23.
- 17 23. Freedman DB, Swanson E. Introducing new interventional procedures within a District General  
18 Hospital, linking with the process for implementing NICE guidance. *Clinical Governance: An*  
19 *International Journal* 2006;11(3):180-86. doi: doi:10.1108/14777270610683100
- 20 24. Spigelman AD. Governance and innovation: experience with a policy on the introduction of new  
21 interventional procedures. *ANZ J Surg* 2006;76(1-2):9-13. doi: 10.1111/j.1445-  
22 2197.2006.03648.x [published Online First: 2006/02/18]
- 23 25. Danjoux NM, Martin DK, Lehoux PN, et al. Adoption of an innovation to repair aortic aneurysms  
24 at a Canadian hospital: a qualitative case study and evaluation. *BMC Health Serv Res*  
25 2007;7:182. doi: 10.1186/1472-6963-7-182 [published Online First: 2007/11/17]
- 26 26. Sharma B, Danjoux NM, Harnish JL, et al. How are decisions to introduce new surgical  
27 technologies made? Advanced laparoscopic surgery at a Canadian community hospital: A  
28 qualitative case study and evaluation. *Surg Innov* 2006;13(4):250-6. doi:  
29 10.1177/1553350606296341 [published Online First: 2007/01/18]
- 30 27. NHS Digital. Estates Return Information Collection, England, 2016-2017 2017 [Available from:  
31 [https://digital.nhs.uk/data-and-information/publications/statistical/estates-returns-](https://digital.nhs.uk/data-and-information/publications/statistical/estates-returns-information-collection/estates-return-information-collection-2016-17)  
32 [information-collection/estates-return-information-collection-2016-17](https://digital.nhs.uk/data-and-information/publications/statistical/estates-returns-information-collection/estates-return-information-collection-2016-17) accessed February  
33 2018]
- 34 28. JISC. Online Surveys 2017 [Available from: <https://www.onlinesurveys.ac.uk> accessed April 2018]
- 35 29. Bryman A. Social research methods: Oxford university press 2016.
- 36 30. Braun V, Clarke, V., & Terry, G. . Thematic Analysis. In: Rohleder PL, A., ed. Qualitative research in  
37 clinical and health psychology. Basingstoke: Palgrave Macmillan 2014.
- 38 31. Health Research Authority. HRA Defining Research 2017 [Available from: [http://www.hra-](http://www.hra-decisiontools.org.uk/research/docs/DefiningResearchTable_Oct2017-1.pdf)  
39 [decisiontools.org.uk/research/docs/DefiningResearchTable\\_Oct2017-1.pdf](http://www.hra-decisiontools.org.uk/research/docs/DefiningResearchTable_Oct2017-1.pdf) accessed  
40 February 2018]
- 41 32. Gornall J. The trial that launched millions of mesh implant procedures: did money compromise  
42 the outcome? *BMJ* 2018;363:k4155. doi: 10.1136/bmj.k4155 %J
- 43  
44  
45  
46  
47  
48  
49  
50  
51  
52  
53  
54  
55  
56  
57  
58  
59  
60

# BMJ Open

## The introduction and adoption of innovative invasive procedures and devices in the NHS: an in-depth analysis of written policies and qualitative interviews (the INTRODUCE study protocol)

|                                 |                                                                                                                                                                                                                                                                                                                                                                                                                                                                                                                                                                                                                                                                                                                                                                                                                                                                                                                                                                                                                                                                                                                                                                                                    |
|---------------------------------|----------------------------------------------------------------------------------------------------------------------------------------------------------------------------------------------------------------------------------------------------------------------------------------------------------------------------------------------------------------------------------------------------------------------------------------------------------------------------------------------------------------------------------------------------------------------------------------------------------------------------------------------------------------------------------------------------------------------------------------------------------------------------------------------------------------------------------------------------------------------------------------------------------------------------------------------------------------------------------------------------------------------------------------------------------------------------------------------------------------------------------------------------------------------------------------------------|
| Journal:                        | <i>BMJ Open</i>                                                                                                                                                                                                                                                                                                                                                                                                                                                                                                                                                                                                                                                                                                                                                                                                                                                                                                                                                                                                                                                                                                                                                                                    |
| Manuscript ID                   | bmjopen-2019-029963.R1                                                                                                                                                                                                                                                                                                                                                                                                                                                                                                                                                                                                                                                                                                                                                                                                                                                                                                                                                                                                                                                                                                                                                                             |
| Article Type:                   | Protocol                                                                                                                                                                                                                                                                                                                                                                                                                                                                                                                                                                                                                                                                                                                                                                                                                                                                                                                                                                                                                                                                                                                                                                                           |
| Date Submitted by the Author:   | 15-Jul-2019                                                                                                                                                                                                                                                                                                                                                                                                                                                                                                                                                                                                                                                                                                                                                                                                                                                                                                                                                                                                                                                                                                                                                                                        |
| Complete List of Authors:       | Cousins, Sian; University of Bristol, Population Health Sciences<br>Richards, Hollie; University of Bristol, Population Health Sciences<br>Zahra, Jesmond; University of Bristol, Population Health Sciences<br>Elliott, Daisy; University of Bristol, Population Health Sciences<br>Avery, Kerry; University of Bristol, Population Health Sciences<br>Robertson, Harry; University of Bristol, Population Health Sciences<br>Paramasivan, Sangeetha ; University of Bristol, Population Health Sciences<br>Wilson, Nicholas; University of Bristol, Population Health Sciences<br>Mathews, Johnny; University of Bristol, Population Health Sciences<br>Tolkien, Zoe; University of Bristol, Population Health Sciences<br>Main, Barry; University of Bristol, Population Health Sciences; University Hospitals Bristol NHS Foundation Trust<br>Blencowe, Natalie; University of Bristol, Population Health Sciences; University Hospitals Bristol NHS Foundation Trust<br>Hinchliffe, Robert; University of Bristol, Population Health Sciences; North Bristol NHS Trust<br>Blazeby, Jane; University of Bristol, Population Health Sciences; University Hospitals Bristol NHS Foundation Trust |
| <b>Primary Subject Heading</b>: | Surgery                                                                                                                                                                                                                                                                                                                                                                                                                                                                                                                                                                                                                                                                                                                                                                                                                                                                                                                                                                                                                                                                                                                                                                                            |
| Secondary Subject Heading:      | Health services research                                                                                                                                                                                                                                                                                                                                                                                                                                                                                                                                                                                                                                                                                                                                                                                                                                                                                                                                                                                                                                                                                                                                                                           |
| Keywords:                       | SURGERY, innovation, NHS, Clinical governance < HEALTH SERVICES ADMINISTRATION & MANAGEMENT                                                                                                                                                                                                                                                                                                                                                                                                                                                                                                                                                                                                                                                                                                                                                                                                                                                                                                                                                                                                                                                                                                        |
|                                 |                                                                                                                                                                                                                                                                                                                                                                                                                                                                                                                                                                                                                                                                                                                                                                                                                                                                                                                                                                                                                                                                                                                                                                                                    |

SCHOLARONE™  
Manuscripts

1  
2  
3 **The introduction and adoption of innovative invasive procedures and devices in the NHS: an in-**  
4 **depth analysis of written policies and qualitative interviews (the INTRODUCE study protocol)**  
5  
6  
7

8 **Cousins S,<sup>1</sup> Richards H,<sup>1</sup> Zahra J,<sup>1</sup> Elliott D,<sup>1</sup> Avery K,<sup>1</sup> Robertson HF,<sup>1</sup> Paramasivan S,<sup>1</sup> Wilson N,<sup>1</sup>**  
9

10 **Mathews J,<sup>1</sup> Tolkien Z,<sup>1</sup> Main BG,<sup>1,2</sup> Blencowe NS,<sup>1,2</sup> Hinchliffe R,<sup>1,3</sup> Blazeby JM<sup>1,2</sup>**  
11  
12

13 <sup>1</sup>National Institute for Health Research Bristol Biomedical Research Centre Surgical Innovation  
14

15 Theme and the Medical Research Council ConDuCT-II (Collaboration and innovation in Difficult and  
16

17 Complex randomised controlled Trials In Invasive procedures) Hub for Trials Methodology Research,  
18

19 Centre for Surgical Research, Population Health Sciences, Bristol Medical School, University of  
20

21 Bristol, 39 Whatley Road, Clifton, Bristol, UK. BS8 2PS;  
22  
23

24 <sup>2</sup>University Hospitals Bristol NHS Foundation Trust, Bristol, UK. BS2 8HW  
25

26 <sup>3</sup>North Bristol NHS Trust, Bristol, UK. BS10 5NB  
27  
28  
29  
30  
31  
32  
33  
34  
35

36 **Corresponding author:** Sian Cousins, [Sian.cousins@bristol.ac.uk](mailto:Sian.cousins@bristol.ac.uk)  
37  
38

39 **Word count: 3089 (4000 max)**  
40  
41  
42  
43  
44  
45  
46  
47  
48  
49  
50  
51  
52  
53  
54  
55  
56  
57  
58  
59  
60

## **Abstract**

### **Introduction**

Innovation is key to improving outcomes in healthcare. Innovative pharmaceutical products undergo rigorous phased research evaluation before they are introduced into practice. The introduction of innovative invasive procedures and devices is much less rigorous and phased research, including randomised controlled trials, is not always undertaken. Whilst the innovator (usually a surgeon) may introduce a new or modified procedure/device within the context of formal research, they may also be introduced by applying for local NHS organisation approval alone. Written policies for the introduction of new procedures and/or devices often form part of this local clinical governance infrastructure; however, little is known about their content or use in practice.

This study aims to systematically investigate how new invasive procedures and devices are introduced in NHS England and Wales.

### **Methods and analysis**

An in-depth analysis of written policies will be undertaken. This will be supplemented with interviews with key stakeholders.

All acute NHS trusts in England and Health Boards in Wales will be systematically approached and asked to provide written policies for the introduction of new invasive procedures and devices.

Information on the following will be captured: I) policy scope, including when new procedures should be introduced within a formal research framework; II) requirements for patient information provision; III) outcome reporting and/or monitoring. Data will be extracted using a standardised form developed iteratively within the study team.

Semi-structured interviews with medical directors, audit and governance leads, and surgeons will explore views regarding the introduction of new invasive procedures into practice, including knowledge of and implementation of current policies.

## **Ethics and dissemination**

In-depth analysis of written policies does not require ethics approval. The University of Bristol Ethics Committee (56522) approved the interview component of the study. Findings from this work will be presented at appropriate conferences and will be published in peer-reviewed journals.

## **Article summary**

### **Strengths and limitations of this study**

- This is the first systematic study addressing how the NHS introduces innovative invasive procedures into clinical practice; a topic of international public, professional and political interest given the wealth of historic and recent examples of patient harm caused by lack of regulation.
- The study combines analysis of written policies and interviews with key stakeholders to ensure an in-depth exploration of the topic to inform national guidance to improve and standardise the introduction of innovative invasive procedures and devices.
- The degree to which policies are actually adhered to across local NHS organisations is not systematically explored in the current study and is recommended for future research.

## **Introduction**

Invasive procedures are a fundamental part of healthcare and can include surgical operations with and without devices, as well as endoscopic and radiologically guided interventions. At least 230 million invasive procedures are delivered worldwide,<sup>1</sup> with 12.5 million undertaken in the United Kingdom (UK) annually.<sup>2</sup> This number is likely to increase with continued innovation, including the advent of new technologies and minimal access procedures.

Innovation in invasive procedures is key. It may include modifying existing techniques,<sup>3</sup> to performing completely new first-in-human invasive procedures.<sup>4</sup> Whilst innovation is common, the governance surrounding it is not standardised and is currently under much scrutiny.<sup>5-7</sup> A recent

1  
2  
3 inquest into the death of a patient following robot-assisted cardiac surgery, a procedure that had  
4 not been previously performed in the UK, found insufficient governance surrounding the  
5 introduction of this innovative procedure.<sup>6</sup> Recommendations from the Coroner, echoed by a  
6 statement from RCS,<sup>8</sup> included introducing stricter governance relating to the use of new  
7 technologies and procedures, specific measures to assess the competence and training received by  
8 clinicians wishing to undertake them, and detailed patient information provision regarding the risks  
9 associated with new procedures.

10  
11  
12 Innovation in invasive procedures may be introduced under the auspices of formal research studies,  
13 with a protocol and application for ethical approval. However, multiple reviews show that ethical  
14 approval is rarely gained when delivering innovative invasive procedures.<sup>9-12</sup> While medical devices  
15 to be used inside the body require a European Conformity (CE) mark<sup>13-15</sup> prior to use in the UK, the  
16 evidence required to gain this certification does not often come from high-quality randomised  
17 controlled trials and post-marketing surveillance is minimal.<sup>7</sup> Although medical device regulations  
18 are improving,<sup>16</sup> this is very different to the tightly governed and transparent developmental  
19 pathways required for the introduction of new pharmaceuticals, including requirements for formal  
20 assessments of risk-benefit balance and post-market safety monitoring.<sup>17</sup>

21  
22  
23 Outside of research, innovative invasive procedures and devices may be introduced via local hospital  
24 policies. The UK National Institute for Clinical Excellence (NICE) is an independent body responsible  
25 for providing evidence-based guidance to the UK National Health Service (NHS) on health and social  
26 care. The NHS refers to the four publicly funded healthcare services in the UK (NHS in England, NHS  
27 Wales, NHS Scotland and Health and Social care in Northern Ireland) and is made up of local NHS  
28 organisations (e.g. NHS trusts in England and health boards in Wales) (supplementary file 1). It is  
29 recommended by NICE that these local NHS organisations have appropriate governance structures in  
30 place to review, authorise and monitor the introduction of new invasive procedures.<sup>18</sup> In addition,  
31 NICE recommends the approval of new invasive procedures that do not have existing NICE guidance

1  
2  
3 should only be given if appropriate training of those delivering the procedure is demonstrated,  
4  
5 patients are made aware of the new status of the procedures, and there are proposed arrangements  
6  
7 for clinical audit.<sup>19</sup> These recommendations are echoed by organisations worldwide.<sup>20-22</sup> In the UK, it  
8  
9 is the responsibility of local hospital organisations to implement this guidance, although the extent  
10  
11 to which this occurs is unknown, and there are instances where innovative procedures are  
12  
13 introduced into practice without any formal governance.<sup>6</sup> Furthermore, where local policies do exist,  
14  
15 little is known about their content or how they are used in practice; how trusts define a new  
16  
17 procedure (i.e. when the guidance should be applied), what information should be given to patients,  
18  
19 and how outcomes of new procedures are recorded and monitored is unclear. Examination of when  
20  
21 policies are being applied provides valuable information about the presence or absence of local  
22  
23 governance frameworks for the introduction of innovative invasive procedures. Furthermore,  
24  
25 guidance related to patient information provision will provide insight into whether patients are  
26  
27 informed about the innovative status of procedures to be delivered. It is also important that  
28  
29 outcomes are routinely and effectively monitored to support their continued use or to ensure those  
30  
31 that are ineffective and/or unsafe are abandoned.  
32  
33  
34  
35

36  
37 A systematic literature review conducted by the Australian Safety and Efficacy Register of New  
38  
39 Interventional Procedures-Surgical<sup>23</sup> identified only six publications related to how acute healthcare  
40  
41 organisations introduce new invasive procedures. These included retrospective case-reports of new  
42  
43 procedures being introduced in individual hospitals in the UK<sup>24</sup> and Australia,<sup>25</sup> and case studies of  
44  
45 qualitative interviews with surgeons and clinicians at hospitals in Canada regarding how decisions to  
46  
47 introduce new technologies were made.<sup>26 27</sup> Findings indicated that the introduction of new  
48  
49 procedures and technologies were based predominantly on surgeons' perceptions that such  
50  
51 innovations would improve patient outcomes, safety and care, with no structured decision-making  
52  
53 process in place at an institutional/governance level. To date, there has been no comprehensive  
54  
55 review of current local NHS policies, many of which are inaccessible by traditional literature  
56  
57 systematic searches used in the above review.  
58  
59  
60

1  
2  
3 **Aim:** To undertake an in-depth analysis of local NHS policies to establish the governance in place for  
4 the introduction of new invasive procedures and devices. This will include examination of: I) how  
5 policies outline scope for their use, including how they define which invasive procedures and devices  
6 are eligible under their remit (e.g. new or modified) and guidance given about when research  
7 approvals should be sought, II) recommendations for patient information provision, III) processes for  
8 monitoring and reporting outcomes of innovative procedures and devices, including how decision-  
9 making regarding adoption or stopping of the procedure or device are made.  
10  
11  
12  
13  
14  
15  
16  
17

### 18 **Methods and analysis**

19  
20  
21  
22 This work will comprise two parts occurring concurrently and iteratively - 1) Systematic analysis of  
23 written local NHS policies for the introduction of new invasive procedures and devices; 2) Interviews  
24 with key stakeholders (e.g. medical directors, audit and governance leads, and surgeons) regarding  
25 surgical innovation in practice, including knowledge of and implementation of current policies.  
26  
27  
28  
29  
30  
31

#### 32 **1. Systematic analysis of NHS policies for the introduction of new invasive procedures and** 33 **devices**

##### 34 ***Sampling and data collection***

35  
36  
37 All acute NHS trusts in England (n=150) and NHS Health Boards in Wales (n=7)<sup>27</sup> will be  
38 systematically approached (Figure 1). Initially, online searches will be performed to determine if  
39 policies for the introduction of new invasive procedures and/or devices into clinical practice are  
40 available online. An online search engine (Google) will be used to locate the website for each NHS  
41 trust/health board. The individual trust/HB website search function will be used to determine if the  
42 organisation has a copy of the relevant policy available online using search terms such as 'new  
43 procedure', 'policy/policies'. Exploratory searching of the trust/HB website will also be conducted to  
44 ensure relevant information is not missed. Where policies are not available, local NHS organisations  
45 will be approached as follows. Medical Directors will be emailed by senior authors (JMB or RH) to  
46  
47  
48  
49  
50  
51  
52  
53  
54  
55  
56  
57  
58  
59  
60



1  
2  
3 request copies of written policies. Non-responders to the initial email will have one email reminder  
4  
5 two weeks later and will then be approached by email and phone by a senior research associate and  
6  
7 a research fellow. Trusts/health boards not responding to this will have one final email from the  
8  
9 original project lead. Policies not wholly related to the introduction of new invasive procedures  
10  
11 and/or devices will be excluded (e.g. device management policies, National or Local Safety Standards  
12  
13 for Invasive Procedures (NatSSIPs, LocSSIPs)). Invasive procedures will be defined as procedures  
14  
15 where access is gained via an incision, natural orifice or percutaneous puncture or involving devices  
16  
17 used inside the body.  
18  
19

20  
21 Trust/health board demographics, including geographical area and acute trust type (England only,  
22  
23 e.g. small, specialist, teaching, foundation status) will be collected.<sup>28</sup>  
24  
25

#### 26 27 ***Data extraction from trust policies*** 28

29  
30 A data extraction form will be developed using a priori themes drawn from the literature and  
31  
32 knowledge of the area amongst team members (see supplementary file 2 for a preliminary data  
33  
34 extraction form), and themes that inductively emerge from the initial coding of a subset of  
35  
36 documents independently by two researchers.  
37  
38

39  
40 The form will be piloted on a sample of policies gathered during scoping work until the team is  
41  
42 satisfied that it fully captures all initial key themes. The finalised form will be converted into an  
43  
44 electronic database<sup>29</sup> where data will be inputted directly from written policies. All policy  
45  
46 documents, including addendums, will be systematically examined. Ten percent of policies will be  
47  
48 randomly selected for double independent data extraction to maximise reliability of data extraction.  
49  
50 Where there are discrepancies these will be resolved through consensus and where this is not  
51  
52 achieved a third independent reviewer will be consulted.  
53  
54

55  
56 Data will be extracted about, I) policy scope, II) patient information provision and consent, and III)  
57  
58 outcome monitoring and decision making (detailed below). For each policy we will also extract  
59  
60

1  
2  
3 details of policy title and date, date of last policy review and date of next policy review. In addition, if  
4  
5 a formal committee is named in the policy as being involved in reviewing the introduction of a new  
6  
7 procedure, we will collect data on the title of the committee, committee chair, core members, and  
8  
9 frequency of meetings.  
10

### 11 12 13 *I) Policy scope*

14  
15 How policies define which invasive procedures and devices are eligible under their remit (e.g.  
16  
17 policy definitions of new procedures) and guidance regarding how to decide whether the new  
18  
19 invasive procedure/device requires 'research approvals', in addition to or instead of local policy  
20  
21 approvals alone, will be captured. Policy scope data will not be used to inform inclusion or  
22  
23 exclusion of policies from analysis.  
24  
25

### 26 27 28 *II) Patient information provision and consent*

29  
30 Guidance about specific consent procedures and how patients should be informed when a  
31  
32 procedure is new, modified or being conducted by a clinician/in a trust for the first time will be  
33  
34 captured. Specific requirements relating to Patient Information Leaflets (PILs), the submission of  
35  
36 these PILs to the trust for evaluation and any processes in place to monitor adherence to  
37  
38 guidance regarding patient information will also be extracted.  
39  
40

### 41 42 43 *III) Outcome monitoring and decision making*

44  
45 In addition to outcomes typically associated with clinical effectiveness studies, outcomes of  
46  
47 specific relevance to evaluating innovation of invasive procedures and devices will be extracted;  
48  
49 these may include operator experiences, intended function (e.g. benefit) of the new/modified  
50  
51 procedure/device, unanticipated harms, and failure and/or abandonment of the  
52  
53 procedure/device. Mechanisms proposed for outcome monitoring (e.g. registered audit,  
54  
55 feedback to the committee) will be captured, in addition to guidance for decision-making  
56  
57  
58  
59  
60

1  
2  
3 regarding when procedures should be introduced into routine clinical practice or abandoned, and  
4  
5 recommendations for wider reporting.  
6  
7

### 8 ***Data analyses (systematic analysis of NHS trust policies)*** 9

10  
11 In order to gain an overview of the scope of the policies and develop an in-depth understanding of  
12  
13 specific themes of relevance to the study aims, mixed methods analyses will be undertaken.  
14  
15

16  
17 Trust/health board demographics, including geographical area and acute trust type will be tabulated.  
18

19 Quantitative data including response rates, and the presence or absence of a new invasive  
20  
21 procedures/devices policy within each local NHS organisation will be presented.  
22  
23

24  
25 Data related to each of the three key data extraction areas outlined above will be tabulated and  
26  
27 descriptive statistics provided. For example, the number of policies that provide guidance for when  
28  
29 procedures should only be conducted within a research study will be counted.  
30  
31

32  
33 Free text data related to each of the three data extraction areas will be extracted from policies and  
34  
35 analysed as following. Verbatim sections of policies will be transferred to qualitative data analysis  
36  
37 software (NVivo, version 11) and analysed thematically in several key stages: I) two researchers will  
38  
39 independently code a subset of policy documents to develop a preliminary coding frame, II) any  
40  
41 discrepancies will be resolved through discussion before the coding frame is applied to the full  
42  
43 dataset, III) codes will be grouped into themes and subthemes by examining commonalities,  
44  
45 differences and relationships in the data, IV) themes will be regularly reviewed to ensure they  
46  
47 accurately encapsulate the data. Findings from this qualitative analysis will be written up  
48  
49 descriptively.  
50  
51

### 52 53 **2. Interviews with key stakeholders** 54

55  
56 In-depth semi-structured interviews will be conducted with representatives from key stakeholder  
57  
58 groups as detailed below.  
59  
60

### ***Recruitment and sampling***

Professionals involved in local governance processes related to the introduction of new procedures and devices (e.g. new procedures committee members, medical directors) and healthcare professionals with experience of introducing new/modified procedures or devices into clinical practice (e.g. surgeons, nurses) will be identified from policy documents, trust websites and clinical contacts of the research team. A snowball sampling approach,<sup>30</sup> whereby interviewees are asked to recommend the names of other potential interviewees, will be used to facilitate recruitment. To ensure maximum variation within the sample,<sup>30</sup> we will interview participants from varying geographical locations, trust types, different surgical specialities and from trusts with and without policies. Participant characteristics will be reviewed as recruitment and analyses are ongoing throughout the study, and underrepresented groups or individuals with particular knowledge and/or experiences of particular interest will be purposively sampled.<sup>30</sup> It is anticipated that up to 60 stakeholders will be interviewed, although data analysis will be driven by the objective of achieving data saturation (whereby no new themes emerge from the data).

### ***Data collection***

Written informed consent will be obtained from all participants before interviews commence. Interviews will be conducted by one of two experienced qualitative researchers, either via telephone or in person, at times convenient for participants. Interviews will be audio-recorded using encrypted audio-recording devices (Olympus DS3500). Discussions will follow a topic guide that will vary by stakeholder group so that key issues are covered, while ensuring participants are able to talk about new issues they feel are important. Topic guides (see supplementary file 3 for example preliminary topic guide for clinicians) will be adapted iteratively as analyses of interviews and written policies progresses so that any emerging issues can be discussed with subsequent participants.

Interviews with professionals involved in governance processes will specifically explore how new procedures are introduced. This will include how policies define the types of technologies and

1  
2  
3 procedures that will be reviewed for introduction to the trust (with examples if possible); the  
4 approval processes in place; methods for follow up, monitoring of approved  
5 technologies/procedures and abandonment of procedures. Interviews with healthcare professionals  
6 will explore their views on surgical innovation, monitoring of new procedures/devices and, when  
7 applicable, their experience of introducing a new procedure or device into clinical practice.  
8  
9  
10  
11  
12  
13  
14

### 15 ***Analysis (interviews with key stakeholders)***

16  
17 Interviews will be transcribed in full and verbatim, checked against the original recording for  
18 accuracy, and imported into NVivo (version 11). Data will then be systematically assigned codes and  
19 analysed thematically using constant comparative techniques.<sup>31</sup> A subset of the transcripts will be  
20 doubled coded by a second qualitative researcher, with any discrepancies in coding discussed and  
21 resolved. Data collection and analysis will proceed in parallel, with emerging findings informing  
22 further sampling (theoretical sampling) and data collection. Dissonant views that challenge the  
23 emerging dominant perspectives will be actively pursued (negative case analysis) to ensure the  
24 inclusion of diverse viewpoints. Descriptive accounts of the data, which take into consideration of  
25 the views and background of the analysts, will then be written.  
26  
27  
28  
29  
30  
31  
32  
33  
34  
35  
36  
37  
38

### 39 **Data protection and confidentiality**

40  
41 All data relating to participants' personal identities will be anonymised using unique study  
42 identifiers. This data will be stored in a separate encrypted file, in a separate location from the study  
43 data on the University of Bristol server. It will only be accessible to the research team and used only  
44 in the event of re-contacting study participants to verify information, e.g. quotes. Verbatim  
45 quotations that may be used for publications or presentations will also be anonymised.  
46  
47  
48  
49  
50  
51  
52  
53

### 54 **Ethics and dissemination**

1  
2  
3 The in-depth analysis of written policies does not require ethics approval, in accordance with the  
4  
5 HRA definition of research.<sup>32</sup> The qualitative component of the work has been approved by the  
6  
7 University of Bristol Ethics Committee (reference 56522).  
8  
9

### 10 **Expected outcomes of the study**

11  
12  
13 This work will provide an in-depth exploration and summary of current governance procedures for  
14  
15 clinicians wishing to introduce innovative invasive procedures and devices into NHS practice in  
16  
17 England and Wales. Understanding how innovative invasive procedures are introduced will identify  
18  
19 limitations in current guidance, inform the development of standardised guidance and raise  
20  
21 hypotheses for future research. It is expected that this work will inform national guidelines regarding  
22  
23 the introduction of innovative invasive procedures.  
24  
25  
26

### 27 **Dissemination**

28  
29  
30 Findings from this work will be presented at appropriate conferences and published across several  
31  
32 papers highlighting main findings. These will include in-depth analyses of the scope of written  
33  
34 policies, including when innovative procedures should be delivered within a research governance  
35  
36 framework, and how policies define 'new' and 'modified' procedures/devices. Additional  
37  
38 publications will focus on guidance related to patient information, consent and outcome monitoring  
39  
40 after the introduction of new procedures and devices. Additionally, qualitative data from interviews  
41  
42 with key stakeholders regarding surgical innovation in practice, including knowledge and  
43  
44 implementation of current policies will be published separately.  
45  
46  
47  
48

### 49 **Discussion**

50  
51  
52 Currently little is known about the ways in which new invasive procedures and devices are  
53  
54 introduced into NHS clinical practice outside the context of research. This is a topical issue as several  
55  
56 concerning and problematic high-profile cases have emerged recently.<sup>5-7, 33</sup> This study will  
57  
58 systematically study current NHS practice to determine the presence, content and implementation  
59  
60

1  
2  
3 of policies relating to the introduction of new invasive procedures and devices in NHS England and  
4  
5 Wales. Identified policies will be scrutinised to determine what guidance is given regarding policy  
6  
7 scope, patient information provision and the monitoring, reporting and review of outcomes.

8  
9  
10 Additionally, interviews with stakeholders (such as surgeons and members of new procedures  
11  
12 committees) will further inform this work.

13  
14  
15 The ways in which new procedures, including surgery, are introduced into practice is a topic of  
16  
17 international public interest. This study is the first of its kind and it is anticipated it will inform future  
18  
19 NHS governance and practice in this field.

### 20 21 22 **Patient and public involvement**

23  
24  
25 The current study comprises a core component of the work undertaken within the National Institute  
26  
27 for Health Research (NIHR) Bristol Biomedical Research Centre (BRC) Surgical Innovation theme,  
28  
29 which aims to improve the safe and transparent translation of innovative procedures/devices to  
30  
31 clinical practice. A patient and public involvement (PPI) group has been established as part of the  
32  
33 NIHR Bristol BRC, where patients who have undergone surgery are asked about their views regarding  
34  
35 how new surgical procedures are undertaken in NHS clinical practice. This involves discussion around  
36  
37 what information patients would like to be provided with before and after receiving a new invasive  
38  
39 procedure/device, and what health/lifestyle outcomes after surgery would be considered important.

40  
41  
42 To date the consensus between PPI group members is that the work being undertaken to improve  
43  
44 the way in which new procedures are introduced into clinical practice is important and could have  
45  
46 positive implications for future health care in the NHS. The current study comprises a first step in  
47  
48 the process of improving how new procedures are introduced into practice and the PPI group will  
49  
50 continue to provide input throughout the study and future work to develop related guidance and  
51  
52 disseminate findings.

### 53 54 55 **Authors' contributions**

1  
2  
3 All authors contributed to the development of the idea and drafting and revision of the manuscript.  
4  
5 JMB is the lead of the NIHR Bristol Biomedical Research Centre Surgical Innovation theme and  
6  
7 formed the methodological ideas to understand surgical innovation with contributions from SC, HR,  
8  
9 JZ, DE, KA, HR, SP, NW, JM, ZT, BGM, NSB, RH. All authors gave approval for the manuscript to be  
10  
11 submitted.  
12  
13

### 14 **Funding statement**

15  
16  
17  
18 This study was supported by the NIHR Biomedical Research Centre at University Hospitals Bristol  
19  
20 NHS Foundation Trust and the University of Bristol, the MRC ConDuCT-II (Collaboration and  
21  
22 innovation for Difficult and Complex randomised controlled Trials In Invasive procedures) Hub for  
23  
24 Trials Methodology Research (MR/K025643/1) ([www.bristol.ac.uk/population-health-](http://www.bristol.ac.uk/population-health-sciences/centres/conduct2)  
25  
26 [sciences/centres/conduct2](http://www.bristol.ac.uk/population-health-sciences/centres/conduct2)) and a NIHR senior investigator award (NF-SI-0514-10114). The views  
27  
28 expressed in this publication are those of the author(s) and not necessarily those of the NHS, the  
29  
30 National Institute for Health Research, the Department of Health and Social Care or the MRC.  
31  
32

### 33 **Competing interests' statement**

34  
35  
36  
37 None declared  
38  
39

### 40 **References**

- 41  
42  
43 1. Weiser TG, Regenbogen SE, Thompson KD, et al. An estimation of the global volume of surgery: a  
44 modelling strategy based on available data. *Lancet* 2008;372(9633):139-44. doi:  
45 10.1016/S0140-6736(08)60878-8 [published Online First: 2008/06/28]  
46  
47 2. Abbott TEF, Fowler AJ, Dobbs TD, et al. Frequency of surgical treatment and related hospital  
48 procedures in the UK: a national ecological study using hospital episode statistics. *Br J*  
49 *Anaesth* 2017;119(2):249-57. doi: 10.1093/bja/aex137 [published Online First: 2017/09/01]  
50  
51 3. Poelman M, Apers J, van den Brand H, et al. The INCH-Trial: a multicentre randomized controlled  
52 trial comparing the efficacy of conventional open surgery and laparoscopic surgery for  
53 incisional hernia repair. *BMC surgery* 2013;13:18-18. doi: 10.1186/1471-2482-13-18  
54  
55 4. Edwards TL, Xue K, Meenink HCM, et al. First-in-human study of the safety and viability of  
56 intraocular robotic surgery. *Nat Biomed Eng* 2018;2:649-56. doi: 10.1038/s41551-018-0248-  
57 4 [published Online First: 2018/09/29]  
58  
59 5. Cohen D. How a fake hip showed up failings in European device regulation. 2012;345:e7090. doi:  
60 10.1136/bmj.e7090 %J BMJ : British Medical Journal  
61  
62 6. Dyer C. Robot assisted surgery is blamed for heart patient's death. 2018;363:k4791. doi:  
63 10.1136/bmj.k4791 %J BMJ



- 1
  - 2
  - 3
  - 4
  - 5
  - 6
  - 7
  - 8
  - 9
  - 10
  - 11
  - 12
  - 13
  - 14
  - 15
  - 16
  - 17
  - 18
  - 19
  - 20
  - 21
  - 22
  - 23
  - 24
  - 25
  - 26
  - 27
  - 28
  - 29
  - 30
  - 31
  - 32
  - 33
  - 34
  - 35
  - 36
  - 37
  - 38
  - 39
  - 40
  - 41
  - 42
  - 43
  - 44
  - 45
  - 46
  - 47
  - 48
  - 49
  - 50
  - 51
  - 52
  - 53
  - 54
  - 55
  - 56
  - 57
  - 58
  - 59
  - 60
7. Heneghan C, Aronson JK, Goldacre B, et al. Transvaginal mesh failure: lessons for regulation of implantable devices. *BMJ* 2017;359:j5515. doi: 10.1136/bmj.j5515 [published Online First: 2017/12/09]
8. Royal College of Surgeons of England. RCS statement on need for national guidelines on the introduction of new procedures and technologies 2018 [Available from: <https://www.rcseng.ac.uk/news-and-events/media-centre/press-releases/robotic-surgery-guidelines/> accessed 09/11/2018].
9. Blencowe NS, Chana P, Whistance RN, et al. Outcome reporting in neoadjuvant surgical trials: a systematic review of the literature and proposals for new standards. *J Natl Cancer Inst* 2014;106(9) doi: 10.1093/jnci/dju217 [published Online First: 2014/08/12]
10. Blencowe NS, McNair AG, Davis CR, et al. Standards of outcome reporting in surgical oncology: a case study in esophageal cancer. *Ann Surg Oncol* 2012;19(13):4012-8. doi: 10.1245/s10434-012-2497-x [published Online First: 2012/07/24]
11. Currie A, Brigic A, Blencowe NS, et al. Systematic review of surgical innovation reporting in laparoendoscopic colonic polyp resection. *Br J Surg* 2015;102(2):e108-16. doi: 10.1002/bjs.9675 [published Online First: 2015/01/30]
12. Whistance RN, Forsythe RO, McNair AG, et al. A systematic review of outcome reporting in colorectal cancer surgery. *Colorectal Dis* 2013;15(10):e548-60. doi: 10.1111/codi.12378 [published Online First: 2013/08/10]
13. Directive 2000/70/EC of the European Parliament and of the Council of 16 November 2000 amending Council Directive 93/42/EEC as regards medical devices incorporating stable derivatives of human blood or human plasma [Available from: <https://eur-lex.europa.eu/legal-content/en/TXT/?uri=CELEX:32000L0070> accessed December 2018]
14. Council Directive 90/385/EEC of 20 June 1990 on the approximation of the laws of the Member States relating to active implantable medical devices 1990;189(20/07):0017-36.
15. Kramer DB, Xu S, Kesselheim AS. Regulation of medical devices in the United States and European Union: Mass Medical Soc, 2012.
16. European Commission. New EU rules to ensure safety of medical devices. European commission - Fact Sheet, 2017.
17. Legislation.gov.uk. The Human Medicines Regulations 2012 2012 [Available from: <http://www.legislation.gov.uk/ukxi/2012/1916/regulation/8/made> 2018].
18. National Institute for Health and Care Excellence. Interventional procedures guidance 2003 [Available from: <https://www.nice.org.uk/about/what-we-do/our-programmes/nice-guidance/nice-interventional-procedures-guidance> accessed February 2018]
19. Department of Health. Health Service Circular (HSC2003/011) – The Interventional Procedures Programme 2003 [Available from: [https://webarchive.nationalarchives.gov.uk/20120503190439/http://www.dh.gov.uk/prod\\_consum\\_dh/groups/dh\\_digitalassets/@dh/@en/documents/digitalasset/dh\\_4064925.pdf](https://webarchive.nationalarchives.gov.uk/20120503190439/http://www.dh.gov.uk/prod_consum_dh/groups/dh_digitalassets/@dh/@en/documents/digitalasset/dh_4064925.pdf) accessed February 2018]
20. Biffi WL, Spain DA, Reitsma AM, et al. Responsible development and application of surgical innovations: a position statement of the Society of University Surgeons. 2008;206(6):1204-09.
21. Stefanidis D, Fanelli RD, Price R, et al. SAGES guidelines for the introduction of new technology and techniques. *Surg Endosc* 2014;28(8):2257-71. doi: 10.1007/s00464-014-3587-6 [published Online First: 2014/06/19]
22. Royal College of Surgeons. Good Surgical Practice - Introduction of new techniques 2014 [Available from: <https://www.rcseng.ac.uk/standards-and-research/gsp/domain-1/1-2-4-introduction-of-new-techniques/> accessed February 2018]
23. Thavaneswaran P, Maddern G, Spigelman A, et al. A review of policies and processes for the introduction of new interventional procedures. ASERNIP-S Report No. 58. Adelaide, South Australia: ASERNIP, 2007.23.

- 1  
2  
3 24. Freedman DB, Swanson E. Introducing new interventional procedures within a District General  
4 Hospital, linking with the process for implementing NICE guidance. 2006;11(3):180-86. doi:  
5 doi:10.1108/14777270610683100  
6  
7 25. Spigelman AD. Governance and innovation: experience with a policy on the introduction of new  
8 interventional procedures. *ANZ J Surg* 2006;76(1-2):9-13. doi: 10.1111/j.1445-  
9 2197.2006.03648.x [published Online First: 2006/02/18]  
10  
11 26. Danjoux NM, Martin DK, Lehoux PN, et al. Adoption of an innovation to repair aortic aneurysms  
12 at a Canadian hospital: a qualitative case study and evaluation. *BMC Health Serv Res*  
13 2007;7:182. doi: 10.1186/1472-6963-7-182 [published Online First: 2007/11/17]  
14  
15 27. Sharma B, Danjoux NM, Harnish JL, et al. How are decisions to introduce new surgical  
16 technologies made? Advanced laparoscopic surgery at a Canadian community hospital: A  
17 qualitative case study and evaluation. *Surg Innov* 2006;13(4):250-6. doi:  
18 10.1177/1553350606296341 [published Online First: 2007/01/18]  
19  
20 28. NHS Digital. Estates Return Information Collection, England, 2016-2017 2017 [Available from:  
21 [https://digital.nhs.uk/data-and-information/publications/statistical/estates-returns-](https://digital.nhs.uk/data-and-information/publications/statistical/estates-returns-information-collection/estates-return-information-collection-2016-17)  
22 [information-collection/estates-return-information-collection-2016-17](https://digital.nhs.uk/data-and-information/publications/statistical/estates-returns-information-collection/estates-return-information-collection-2016-17) accessed February  
23 2018]  
24  
25 29. JISC. Online Surveys 2017 [Available from: <https://www.onlinesurveys.ac.uk> accessed  
26 12/02/2018].  
27  
28 30. Bryman A. Social research methods: Oxford university press 2016.  
29  
30 31. Braun V, Clarke, V., & Terry, G. . Thematic Analysis. In: Rohleder PL, A., ed. Qualitative research in  
31 clinical and health psychology. Basingstoke: Palgrave Macmillan 2014.  
32  
33 32. Health Research Authority. HRA Defining Research 2017 [Available from: [http://www.hra-](http://www.hra-decisiontools.org.uk/research/docs/DefiningResearchTable_Oct2017-1.pdf)  
34 [decisiontools.org.uk/research/docs/DefiningResearchTable\\_Oct2017-1.pdf](http://www.hra-decisiontools.org.uk/research/docs/DefiningResearchTable_Oct2017-1.pdf) accessed  
35 February 2018]  
36  
37 33. Gornall J. The trial that launched millions of mesh implant procedures: did money compromise  
38 the outcome? 2018;363:k4155. doi: 10.1136/bmj.k4155 %J BMJ  
39  
40  
41  
42  
43  
44  
45  
46  
47  
48  
49  
50  
51  
52  
53  
54  
55  
56  
57  
58  
59  
60

### **Figure legends**

Figure 1. Approach to trusts and health boards and planned data extraction from policies for the introduction of new invasive procedures and devices

Page 17 of 24  
 Figure 1. Approach to trusts and health boards and planned data extraction from policies for the introduction of new invasive procedures and devices.

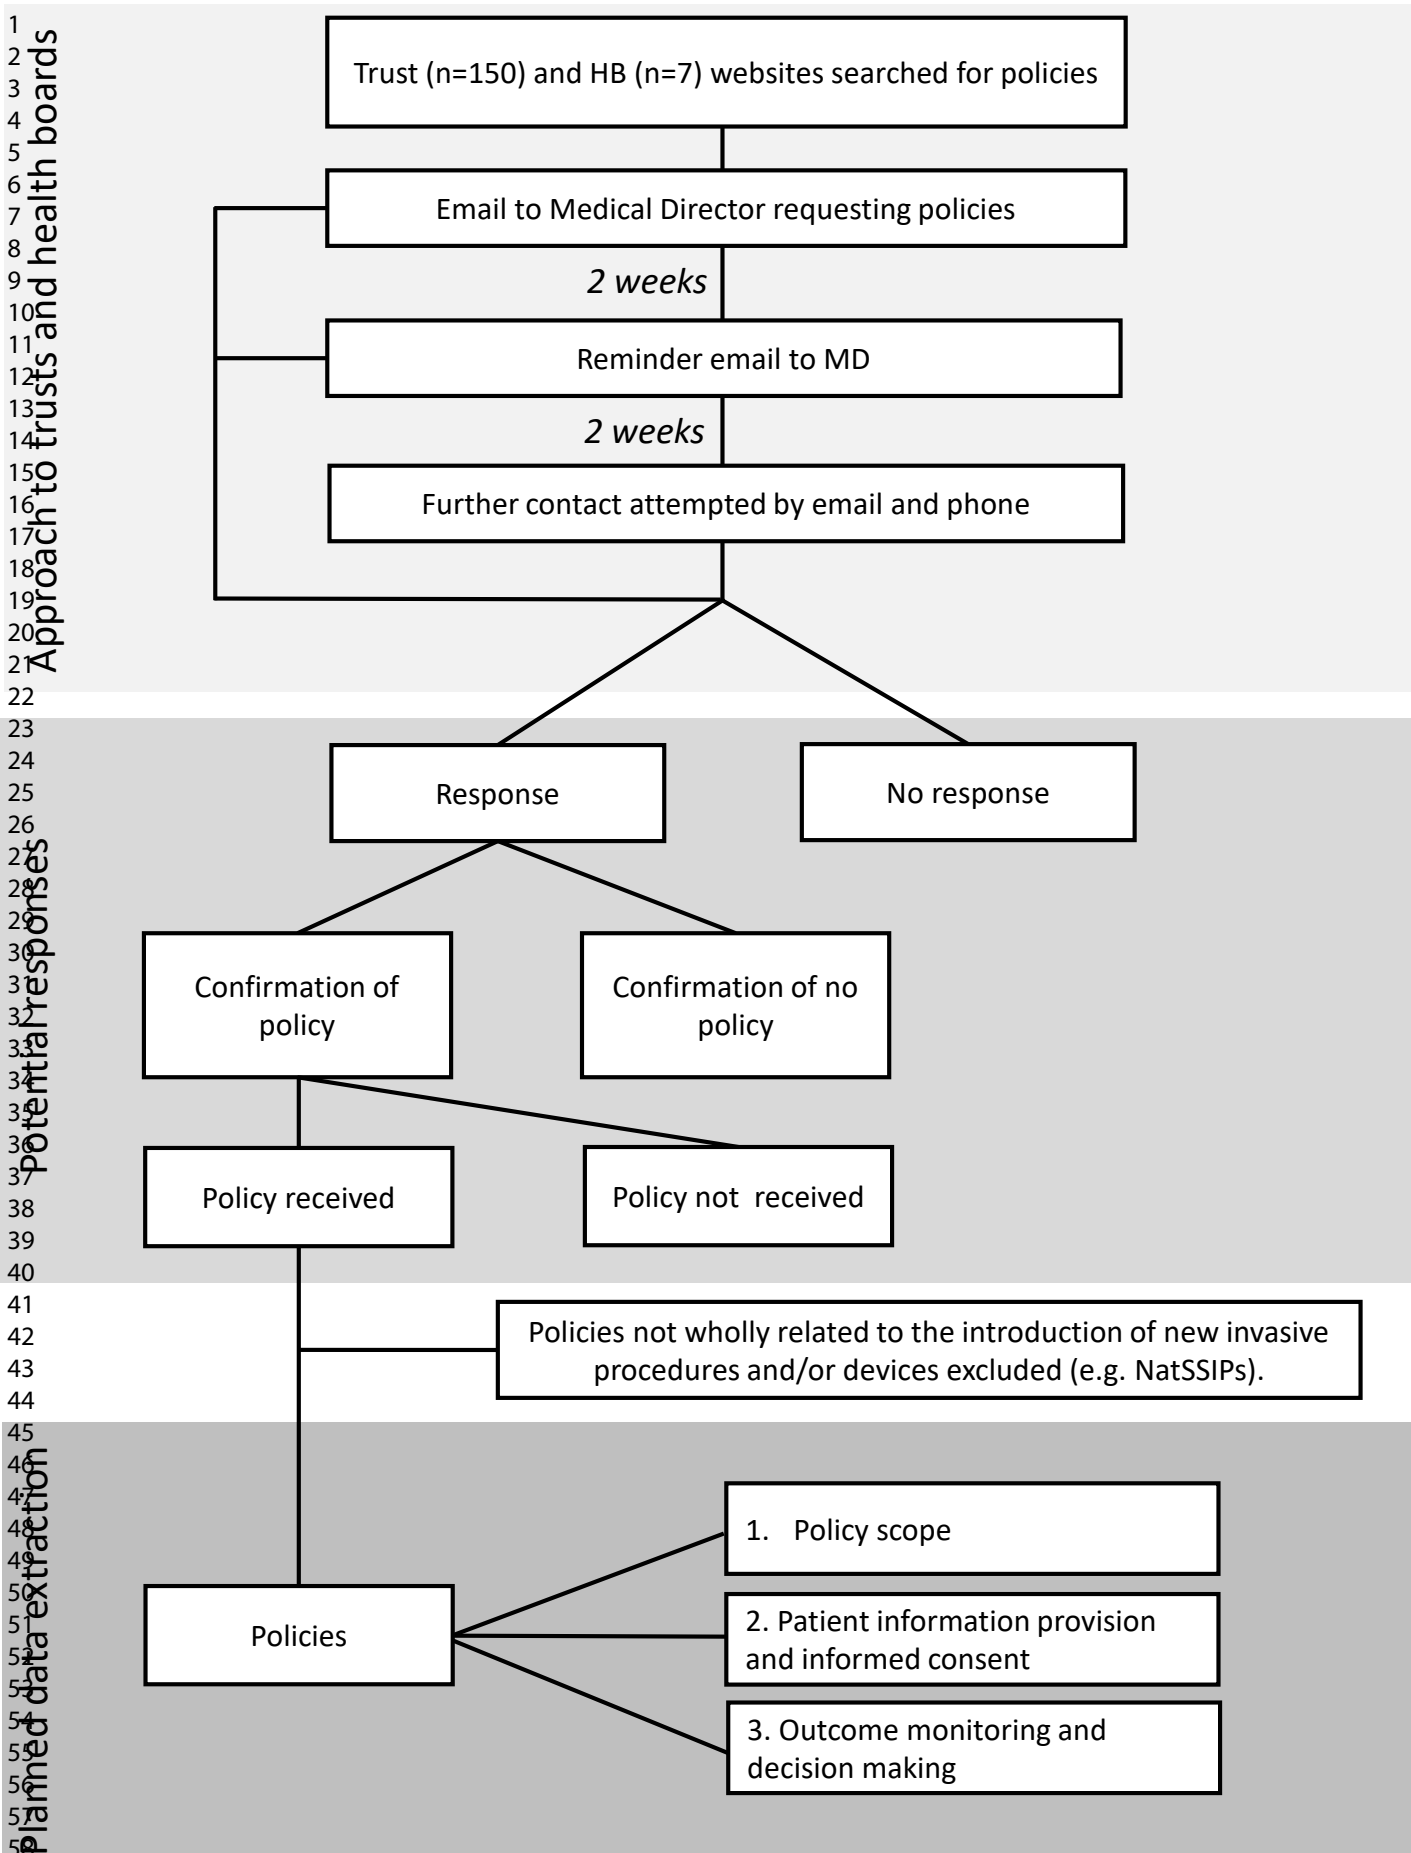

1  
2  
3  
4  
5  
6  
7  
8  
9  
10  
11  
12  
13  
14  
15  
16  
17  
18  
19  
20  
21  
22  
23  
24  
25  
26  
27  
28  
29  
30  
31  
32  
33  
34  
35  
36  
37  
38  
39  
40  
41  
42  
43  
44  
45  
46  
47  
48  
49  
50  
51  
52  
53  
54  
55  
56  
57  
58  
59  
60

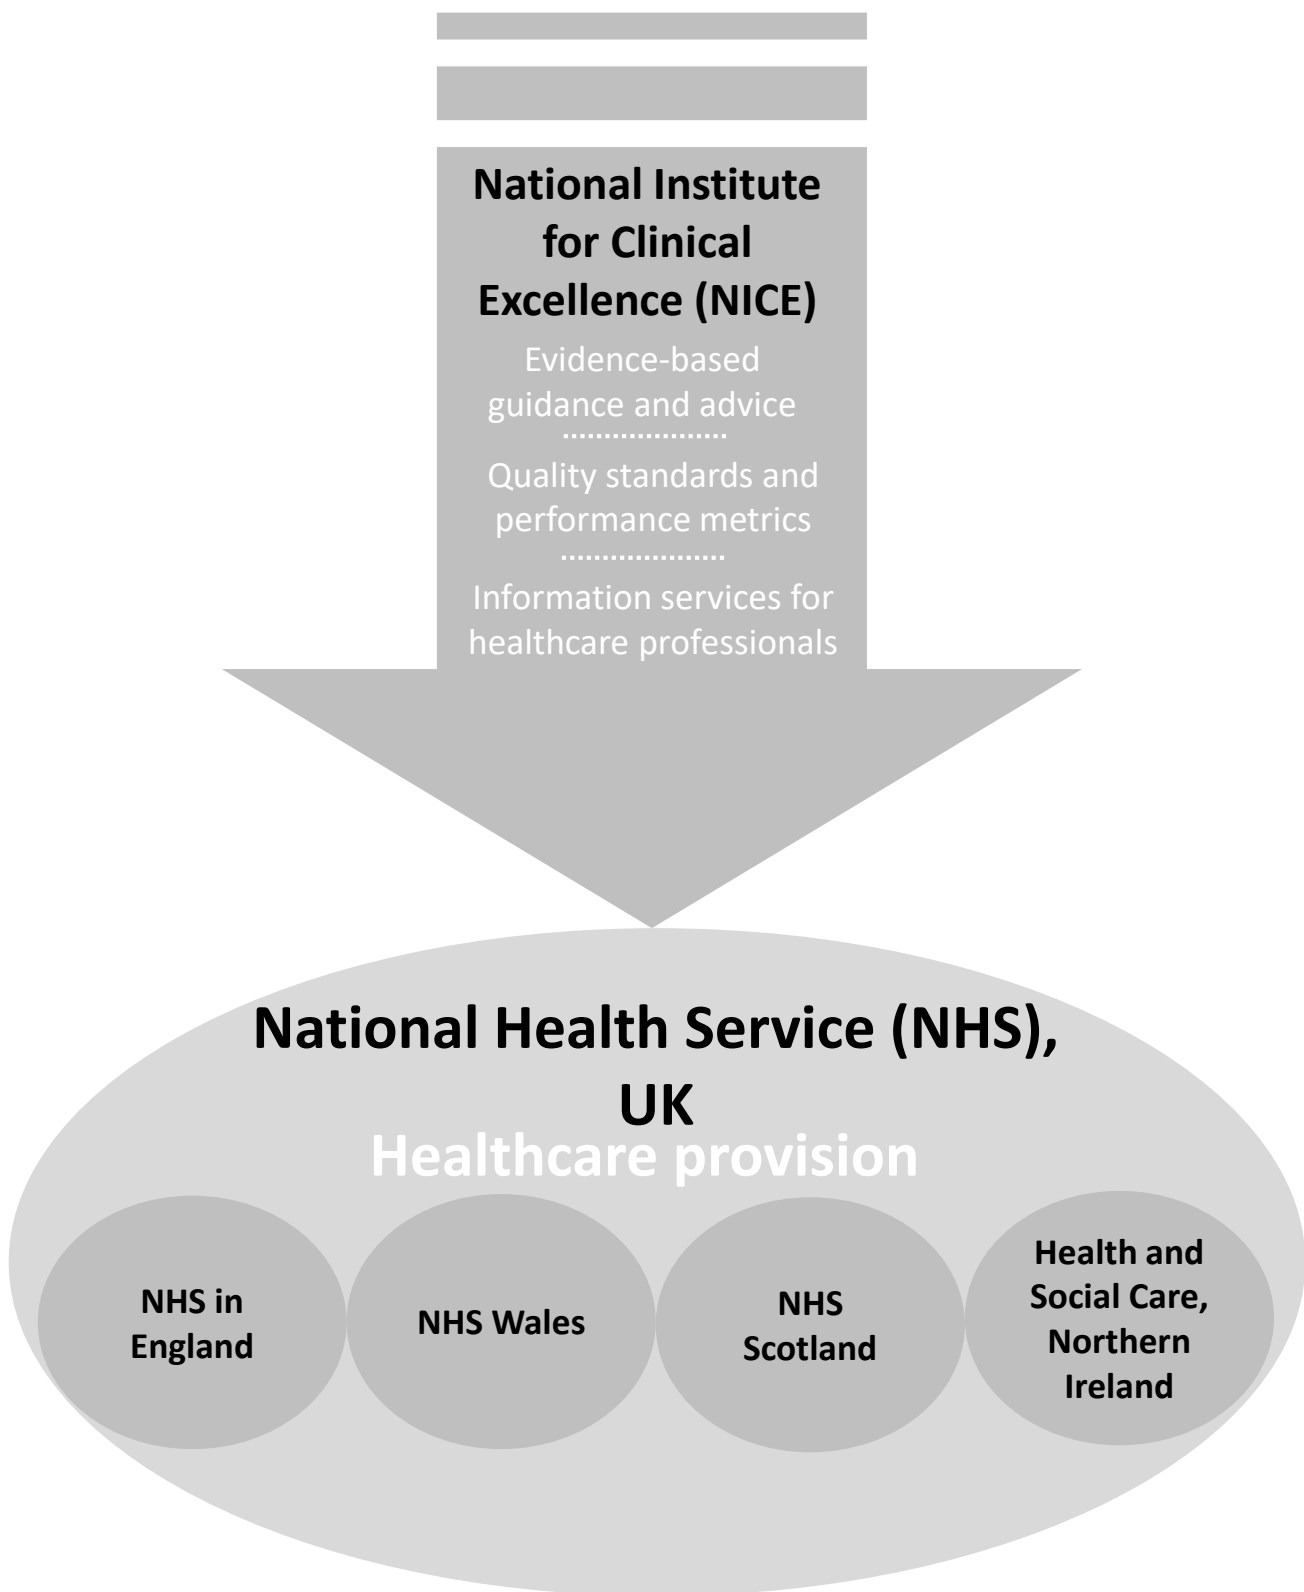

|    |                                                                               |                             |                              |
|----|-------------------------------------------------------------------------------|-----------------------------|------------------------------|
| 1  | <b>DATA EXTRACTION DETAILS</b>                                                |                             |                              |
| 2  |                                                                               |                             |                              |
| 3  |                                                                               |                             |                              |
| 4  |                                                                               |                             |                              |
| 5  | <b>1 Who is extracting the data? (initials)</b>                               |                             |                              |
| 6  | [ ][ ]                                                                        |                             |                              |
| 7  |                                                                               |                             |                              |
| 8  |                                                                               |                             |                              |
| 9  | <b>2 What is the name of the trust?</b>                                       |                             |                              |
| 10 |                                                                               |                             |                              |
| 11 |                                                                               |                             |                              |
| 12 | <b>3 What is the Trust ID?</b>                                                |                             |                              |
| 13 | [ ][ ]                                                                        |                             |                              |
| 14 |                                                                               |                             |                              |
| 15 |                                                                               |                             |                              |
| 16 | <b>4 Policy title:</b>                                                        |                             |                              |
| 17 |                                                                               |                             |                              |
| 18 |                                                                               |                             |                              |
| 19 | <b>5 Current policy and/or version number:</b>                                |                             |                              |
| 20 | [ ][ ]                                                                        |                             |                              |
| 21 |                                                                               |                             |                              |
| 22 |                                                                               |                             |                              |
| 23 | <b>SCOPE OF POLICY</b>                                                        |                             |                              |
| 24 |                                                                               |                             |                              |
| 25 | <b>1 What procedures/devices does the policy apply to?</b>                    |                             |                              |
| 26 |                                                                               |                             |                              |
| 27 |                                                                               |                             |                              |
| 28 | <b>a) Invasive procedures</b>                                                 |                             |                              |
| 29 | <input type="checkbox"/> Yes                                                  | <input type="checkbox"/> No | <input type="checkbox"/> N/A |
| 30 | <i>If yes, answer i) - ii). If no or not stated go to question b).</i>        |                             |                              |
| 31 | <b>i) What term is used to describe these procedures?</b>                     |                             |                              |
| 32 |                                                                               |                             |                              |
| 33 |                                                                               |                             |                              |
| 34 | <b>ii) Does the policy define invasive procedures (or similar term used)?</b> |                             |                              |
| 35 | <input type="checkbox"/> Yes                                                  | <input type="checkbox"/> No |                              |
| 36 |                                                                               |                             |                              |
| 37 | If yes -                                                                      |                             |                              |
| 38 | • Copy and paste definition:                                                  |                             |                              |
| 39 |                                                                               |                             |                              |
| 40 |                                                                               |                             |                              |
| 41 |                                                                               |                             |                              |
| 42 | <b>b) Invasive devices</b>                                                    |                             |                              |
| 43 | <input type="checkbox"/> Yes                                                  | <input type="checkbox"/> No | <input type="checkbox"/> N/A |
| 44 | <i>If yes answer i)-iv). If no or not stated go to c).</i>                    |                             |                              |
| 45 | <b>i) What term is used to describe invasive devices?</b>                     |                             |                              |
| 46 |                                                                               |                             |                              |
| 47 |                                                                               |                             |                              |
| 48 | <b>ii) Does the policy define invasive devices (or similar term used)?</b>    |                             |                              |
| 49 | <input type="checkbox"/> Yes                                                  | <input type="checkbox"/> No |                              |
| 50 |                                                                               |                             |                              |
| 51 | If yes -                                                                      |                             |                              |
| 52 | • Copy and paste definition:                                                  |                             |                              |
| 53 |                                                                               |                             |                              |
| 54 |                                                                               |                             |                              |
| 55 |                                                                               |                             |                              |
| 56 |                                                                               |                             |                              |
| 57 |                                                                               |                             |                              |
| 58 |                                                                               |                             |                              |
| 59 |                                                                               |                             |                              |
| 60 |                                                                               |                             |                              |

|    |           |                                                                                                                                              |                             |
|----|-----------|----------------------------------------------------------------------------------------------------------------------------------------------|-----------------------------|
| 1  |           |                                                                                                                                              |                             |
| 2  |           |                                                                                                                                              |                             |
| 3  |           |                                                                                                                                              |                             |
| 4  |           |                                                                                                                                              |                             |
| 5  | <b>2</b>  | <b>When should the policy be implemented?</b>                                                                                                |                             |
| 6  |           |                                                                                                                                              |                             |
| 7  | <b>a)</b> | <b>When procedures/devices are new (or a similar term that implies this)?</b>                                                                |                             |
| 8  |           |                                                                                                                                              |                             |
| 9  |           |                                                                                                                                              |                             |
| 10 |           | <input type="checkbox"/> Yes (explicitly states that the policy should be implemented in this instance)                                      |                             |
| 11 |           |                                                                                                                                              |                             |
| 12 |           | <input type="checkbox"/> No (explicitly states that the policy should <u>not</u> be implemented in this instance)                            |                             |
| 13 |           |                                                                                                                                              |                             |
| 14 |           | <input type="checkbox"/> Unclear                                                                                                             |                             |
| 15 |           |                                                                                                                                              |                             |
| 16 |           | <input type="checkbox"/> Not stated (does not state whether or not policy should be implemented in this instance)                            |                             |
| 17 |           |                                                                                                                                              |                             |
| 18 |           | <i>If yes, no or unclear answer i)-iii). If not stated go to b).</i>                                                                         |                             |
| 19 |           |                                                                                                                                              |                             |
| 20 |           | <b>i) Does the policy define 'new' (or similar term)?</b>                                                                                    |                             |
| 21 |           |                                                                                                                                              |                             |
| 22 |           | <input type="checkbox"/> Yes                                                                                                                 | <input type="checkbox"/> No |
| 23 |           |                                                                                                                                              |                             |
| 24 |           |                                                                                                                                              |                             |
| 25 | <b>b)</b> | <b>When procedures/devices are modified (to include references to 'changes in clinical practice') (or a similar term that implies this)?</b> |                             |
| 26 |           |                                                                                                                                              |                             |
| 27 |           | <input type="checkbox"/> Yes (explicitly states that the policy should be implemented in this instance)                                      |                             |
| 28 |           |                                                                                                                                              |                             |
| 29 |           | <input type="checkbox"/> No (explicitly states that the policy should <u>not</u> be implemented in this instance)                            |                             |
| 30 |           |                                                                                                                                              |                             |
| 31 |           | <input type="checkbox"/> Unclear                                                                                                             |                             |
| 32 |           |                                                                                                                                              |                             |
| 33 |           | <input type="checkbox"/> Not stated (does not state whether or not policy should be implemented in this instance)                            |                             |
| 34 |           |                                                                                                                                              |                             |
| 35 |           | <i>If yes, no or unclear answer i)-iii). If not stated go to c).</i>                                                                         |                             |
| 36 |           |                                                                                                                                              |                             |
| 37 |           | <b>i) Does the policy define 'modification' (or similar term)?</b>                                                                           |                             |
| 38 |           | <input type="checkbox"/> Yes                                                                                                                 | <input type="checkbox"/> No |
| 39 |           |                                                                                                                                              |                             |
| 40 |           |                                                                                                                                              |                             |
| 41 | <b>c)</b> | <b>When a procedure/device is used within a research study</b>                                                                               |                             |
| 42 |           |                                                                                                                                              |                             |
| 43 |           | <input type="checkbox"/> Yes (explicitly states that the policy should be implemented in this instance)                                      |                             |
| 44 |           |                                                                                                                                              |                             |
| 45 |           | <input type="checkbox"/> No (explicitly states that the policy should <u>not</u> be implemented in this instance)                            |                             |
| 46 |           |                                                                                                                                              |                             |
| 47 |           | <input type="checkbox"/> Unclear                                                                                                             |                             |
| 48 |           |                                                                                                                                              |                             |
| 49 |           | <input type="checkbox"/> Not stated (does not state whether or not policy should be implemented in this instance)                            |                             |
| 50 |           | <b>i) Copy and paste all text: (if none, type N/A) [QUALITATIVE DATA]</b>                                                                    |                             |
| 51 |           |                                                                                                                                              |                             |
| 52 |           |                                                                                                                                              |                             |
| 53 | <b>d)</b> | <b>When procedures/devices approved by research ethics are used outside of the specified protocol</b>                                        |                             |
| 54 |           |                                                                                                                                              |                             |
| 55 |           | <input type="checkbox"/> Yes (explicitly states that the policy should be implemented in this instance)                                      |                             |
| 56 |           |                                                                                                                                              |                             |
| 57 |           | <input type="checkbox"/> No (explicitly states that the policy should <u>not</u> be implemented in this instance)                            |                             |
| 58 |           |                                                                                                                                              |                             |
| 59 |           |                                                                                                                                              |                             |
| 60 |           |                                                                                                                                              |                             |

|    |                                        |                                                                                                                                                              |                             |                                  |
|----|----------------------------------------|--------------------------------------------------------------------------------------------------------------------------------------------------------------|-----------------------------|----------------------------------|
| 1  |                                        | <input type="checkbox"/> Unclear                                                                                                                             |                             |                                  |
| 2  |                                        | <input type="checkbox"/> Not stated (does not state whether or not policy should be implemented in this instance)                                            |                             |                                  |
| 3  |                                        | i) Copy and paste all text: (if none, type N/A) [QUALITATIVE DATA]                                                                                           |                             |                                  |
| 4  |                                        |                                                                                                                                                              |                             |                                  |
| 5  |                                        |                                                                                                                                                              |                             |                                  |
| 6  | <b>e)</b>                              | <b>Other. Please state any other instances in which the policy should be implemented (if none, type N/A):</b>                                                |                             |                                  |
| 7  |                                        |                                                                                                                                                              |                             |                                  |
| 8  |                                        |                                                                                                                                                              |                             |                                  |
| 9  |                                        |                                                                                                                                                              |                             |                                  |
| 10 |                                        |                                                                                                                                                              |                             |                                  |
| 11 |                                        |                                                                                                                                                              |                             |                                  |
| 12 |                                        |                                                                                                                                                              |                             |                                  |
| 13 |                                        |                                                                                                                                                              |                             |                                  |
| 14 | <b>PATIENT INFORMATION AND CONSENT</b> |                                                                                                                                                              |                             |                                  |
| 15 |                                        |                                                                                                                                                              |                             |                                  |
| 16 |                                        |                                                                                                                                                              |                             |                                  |
| 17 | <b>1</b>                               | <b>Does the policy state that patients should receive information and/or complete a consent form that is specific to the new procedure/device delivered?</b> |                             |                                  |
| 18 |                                        | <input type="checkbox"/> Yes                                                                                                                                 | <input type="checkbox"/> No | <input type="checkbox"/> Unclear |
| 19 |                                        | <i>If yes or unclear answer a)-c). If no go to section I.</i>                                                                                                |                             |                                  |
| 20 |                                        |                                                                                                                                                              |                             |                                  |
| 21 | <b>a)</b>                              | <b>Is the applicant required to submit the patient information leaflet and/or consent form with the application?</b>                                         |                             |                                  |
| 22 |                                        | <input type="checkbox"/> Yes                                                                                                                                 | <input type="checkbox"/> No | <input type="checkbox"/> Unclear |
| 23 |                                        |                                                                                                                                                              |                             |                                  |
| 24 |                                        |                                                                                                                                                              |                             |                                  |
| 25 | <b>b)</b>                              | <b>Does the policy provide guidance on what details should be included in the patient information leaflet and/or consent form?</b>                           |                             |                                  |
| 26 |                                        | <input type="checkbox"/> Yes                                                                                                                                 | <input type="checkbox"/> No | <input type="checkbox"/> Unclear |
| 27 |                                        | <i>If yes, answer i). If no or unclear go to section I.</i>                                                                                                  |                             |                                  |
| 28 |                                        |                                                                                                                                                              |                             |                                  |
| 29 |                                        |                                                                                                                                                              |                             |                                  |
| 30 |                                        |                                                                                                                                                              |                             |                                  |
| 31 |                                        |                                                                                                                                                              |                             |                                  |
| 32 |                                        |                                                                                                                                                              |                             |                                  |
| 33 |                                        |                                                                                                                                                              |                             |                                  |
| 34 |                                        |                                                                                                                                                              |                             |                                  |
| 35 |                                        |                                                                                                                                                              |                             |                                  |
| 36 |                                        |                                                                                                                                                              |                             |                                  |
| 37 |                                        |                                                                                                                                                              |                             |                                  |
| 38 | <b>c)</b>                              | <b>Does the policy state that specific PIL information should be provided for all approved procedures/devices?</b>                                           |                             |                                  |
| 39 |                                        | Yes - specific PIL information should be provided for all new procedures/devices.                                                                            |                             |                                  |
| 40 |                                        | No - specific PIL information is only required in a subset of new procedures/devices (i.e. if there is no NICE Guidance in place).                           |                             |                                  |
| 41 |                                        | Not stated                                                                                                                                                   |                             |                                  |
| 42 |                                        |                                                                                                                                                              |                             |                                  |
| 43 |                                        |                                                                                                                                                              |                             |                                  |
| 44 |                                        |                                                                                                                                                              |                             |                                  |
| 45 |                                        |                                                                                                                                                              |                             |                                  |
| 46 |                                        |                                                                                                                                                              |                             |                                  |
| 47 | <b>AUDIT AND OUTCOME MONITORING</b>    |                                                                                                                                                              |                             |                                  |
| 48 |                                        |                                                                                                                                                              |                             |                                  |
| 49 |                                        |                                                                                                                                                              |                             |                                  |
| 50 | <b>1</b>                               | <b>Does the policy state that the use of new procedures/devices should be monitored/reviewed in any way?</b>                                                 |                             |                                  |
| 51 |                                        | <input type="checkbox"/> Yes                                                                                                                                 | <input type="checkbox"/> No | <input type="checkbox"/> N/A     |
| 52 |                                        | <i>If yes, go to question 2. If no or not stated go to section H.</i>                                                                                        |                             |                                  |
| 53 |                                        |                                                                                                                                                              |                             |                                  |
| 54 |                                        |                                                                                                                                                              |                             |                                  |
| 55 |                                        |                                                                                                                                                              |                             |                                  |
| 56 |                                        |                                                                                                                                                              |                             |                                  |
| 57 |                                        |                                                                                                                                                              |                             |                                  |
| 58 |                                        |                                                                                                                                                              |                             |                                  |
| 59 | <b>2</b>                               | <b>Does the policy require applicants to submit outcome data, including adverse events, clinical complications etc?</b>                                      |                             |                                  |
| 60 |                                        |                                                                                                                                                              |                             |                                  |

|           |                                                                                                                                                 |                             |                                  |
|-----------|-------------------------------------------------------------------------------------------------------------------------------------------------|-----------------------------|----------------------------------|
|           | <input type="checkbox"/> Yes                                                                                                                    | <input type="checkbox"/> No | <input type="checkbox"/> Unclear |
|           | <i>If yes, answer a)-d). If no or unclear go to question 4.</i>                                                                                 |                             |                                  |
| <b>a)</b> | <b>Who is responsible for submitting monitoring/outcome data? (tick all that apply)</b>                                                         |                             |                                  |
|           | <input type="checkbox"/> Individual clinician                                                                                                   |                             |                                  |
|           | <input type="checkbox"/> Head of department                                                                                                     |                             |                                  |
|           | <input type="checkbox"/> Other. Please state:                                                                                                   |                             |                                  |
|           | <input type="checkbox"/> Not stated                                                                                                             |                             |                                  |
| <b>b)</b> | <b>Who is the monitoring/outcome data submitted too? (tick all that apply)</b>                                                                  |                             |                                  |
|           | <input type="checkbox"/> Trust committee responsible for the introduction of new procedures/devices                                             |                             |                                  |
|           | <input type="checkbox"/> NICE                                                                                                                   |                             |                                  |
|           | <input type="checkbox"/> Audit & Effectiveness Dept/Group                                                                                       |                             |                                  |
|           | <input type="checkbox"/> Clinical effectiveness/safety group                                                                                    |                             |                                  |
|           | <input type="checkbox"/> Clinical audit group                                                                                                   |                             |                                  |
|           | <input type="checkbox"/> Medical and/or Nursing Director                                                                                        |                             |                                  |
|           | <input type="checkbox"/> Clinical governance group                                                                                              |                             |                                  |
|           | <input type="checkbox"/> Other. Please state:                                                                                                   |                             |                                  |
|           | <input type="checkbox"/> Not stated                                                                                                             |                             |                                  |
| <b>c)</b> | <b>Does the policy specify the type of monitoring/outcome data to be submitted?</b>                                                             |                             |                                  |
|           | <input type="checkbox"/> Yes                                                                                                                    | <input type="checkbox"/> No |                                  |
|           | <i>If yes, answer i)-ii). If no go to question d).</i>                                                                                          |                             |                                  |
|           | <b>i) Which of the following outcomes are specified? (tick all that apply)</b>                                                                  |                             |                                  |
|           | <input type="checkbox"/> Adverse events                                                                                                         |                             |                                  |
|           | <input type="checkbox"/> Safety                                                                                                                 |                             |                                  |
|           | <input type="checkbox"/> Effectiveness                                                                                                          |                             |                                  |
|           | <input type="checkbox"/> Cost related outcomes                                                                                                  |                             |                                  |
|           | <input type="checkbox"/> Near misses                                                                                                            |                             |                                  |
|           | <input type="checkbox"/> Patient Experience/PROMS                                                                                               |                             |                                  |
|           | <input type="checkbox"/> Other. Please state:                                                                                                   |                             |                                  |
| <b>3</b>  | <b>When does the policy state that the procedure should be reviewed/outcome data submitted?</b>                                                 |                             |                                  |
|           | <input type="checkbox"/> After a certain length of time. <i>If selected answer a).</i>                                                          |                             |                                  |
|           | <input type="checkbox"/> After a certain number of cases. <i>If selected answer b).</i>                                                         |                             |                                  |
|           | <input type="checkbox"/> This is decided on a case by case basis or according to level of approval/recommendation given by the committee/group. |                             |                                  |
|           | <input type="checkbox"/> Unclear. <i>If selected answer c)</i>                                                                                  |                             |                                  |
| <b>a)</b> | <b>How many months?</b>                                                                                                                         |                             |                                  |
|           | [ ] [ ] [ ] [ ]                                                                                                                                 |                             |                                  |
|           | <i>Go to question 6</i>                                                                                                                         |                             |                                  |
| <b>b)</b> | <b>How many cases?</b>                                                                                                                          |                             |                                  |



|          |                                                                                                                                                                                                                     |                             |                                  |
|----------|---------------------------------------------------------------------------------------------------------------------------------------------------------------------------------------------------------------------|-----------------------------|----------------------------------|
|          | [ ] [ ] [ ] [ ]                                                                                                                                                                                                     |                             |                                  |
|          | <i>Go to question 6</i>                                                                                                                                                                                             |                             |                                  |
|          |                                                                                                                                                                                                                     |                             |                                  |
|          | <b>c) Copy and paste text:</b>                                                                                                                                                                                      |                             |                                  |
|          |                                                                                                                                                                                                                     |                             |                                  |
| <b>4</b> | <b>Does the policy outline when the procedure/device may be used in clinical practice without continuing review via this policy? (ie. when the procedure/device can be adopted in to routine clinical practice)</b> |                             |                                  |
|          | <input type="checkbox"/> Yes                                                                                                                                                                                        | <input type="checkbox"/> No | <input type="checkbox"/> Unclear |
|          | <i>If yes or unclear, answer a). If no go to question 8.</i>                                                                                                                                                        |                             |                                  |
|          | <b>a) Copy and paste text:</b>                                                                                                                                                                                      |                             |                                  |
|          |                                                                                                                                                                                                                     |                             |                                  |
| <b>5</b> | <b>Does the policy outline when or why the use of a new procedure may be stopped/abandoned/immediately reported to MD?</b>                                                                                          |                             |                                  |
|          | <input type="checkbox"/> Yes                                                                                                                                                                                        | <input type="checkbox"/> No | <input type="checkbox"/> Unclear |
|          | <i>If yes or unclear, answer a). If no go to section H.</i>                                                                                                                                                         |                             |                                  |
|          | <b>a) Copy and paste text:</b>                                                                                                                                                                                      |                             |                                  |
|          |                                                                                                                                                                                                                     |                             |                                  |
|          | <b>ADDITIONAL NOTES</b>                                                                                                                                                                                             |                             |                                  |
|          |                                                                                                                                                                                                                     |                             |                                  |
| <b>1</b> | <b>Please record any additional comments here. These may relate to data extraction or may be reflections on the policy.</b>                                                                                         |                             |                                  |
|          |                                                                                                                                                                                                                     |                             |                                  |

1  
2  
3 Supplementary file 3. Example preliminary topic guide for interviews with clinicians  
4  
5

- 6 • Introductory remarks, including taking verbal consent
- 7
- 8 • Can you tell me about yourself?
  - 9 ○ What is your current position and role?
  - 10 ○ Can you describe the range /type(s) of surgical procedures you undertake?
  - 11 ○ Particular areas of interest/expertise?
  - 12
- 13 • As you know, we are looking at innovation in surgery. Can you talk me through how you
- 14 would define innovation? (Newness; degree of change, level of risk, impact?)
- 15
- 16 • Have you experienced an innovative procedure being implemented into practice?
  - 17 ○ If so, can you describe it to me? What made it innovative?
  - 18 ○ What about a time when you have had to learn a new procedure?
  - 19 ○ Potential Prompts: How/where implemented? How did you learn about it? Any
  - 20 changes/refinements over time?
  - 21 ○ Was the procedure monitored in anyway?
  - 22 ○ What has happened to it now?
  - 23
  - 24
- 25
- 26 • If you or a colleague did develop an innovative procedure, do you think ethics approval is
- 27 needed?
- 28 • Is there a procedure for implementing an innovative procedure at your hospital?
- 29 • Do you think patients should be informed about the new procedure? What aspects
- 30 important to communicate?
  - 31 ○ How do you think patients will respond to innovative procedures? What does
  - 32 'informed consent' mean to you?
  - 33
  - 34
- 35 • Ending the interview: Is there anything else that I haven't mentioned? Anyone else you
- 36 recommend I could contact?
- 37
- 38
- 39
- 40
- 41
- 42
- 43
- 44
- 45
- 46
- 47
- 48
- 49
- 50
- 51
- 52
- 53
- 54
- 55
- 56
- 57
- 58
- 59
- 60
