# Supplementary material for: Introduction and adoption of innovative invasive procedures and devices in the NHS: an in-depth analysis of written policies and qualitative interviews (the INTRODUCE study protocol)
Source: PubMed Central journal article supplement (PMC6719760; doi:10.1136/bmjopen-2019-029963), 2019-08-26

Supplementary file 1. Figure showing the relationship between NICE and the NHS, including roles and structure

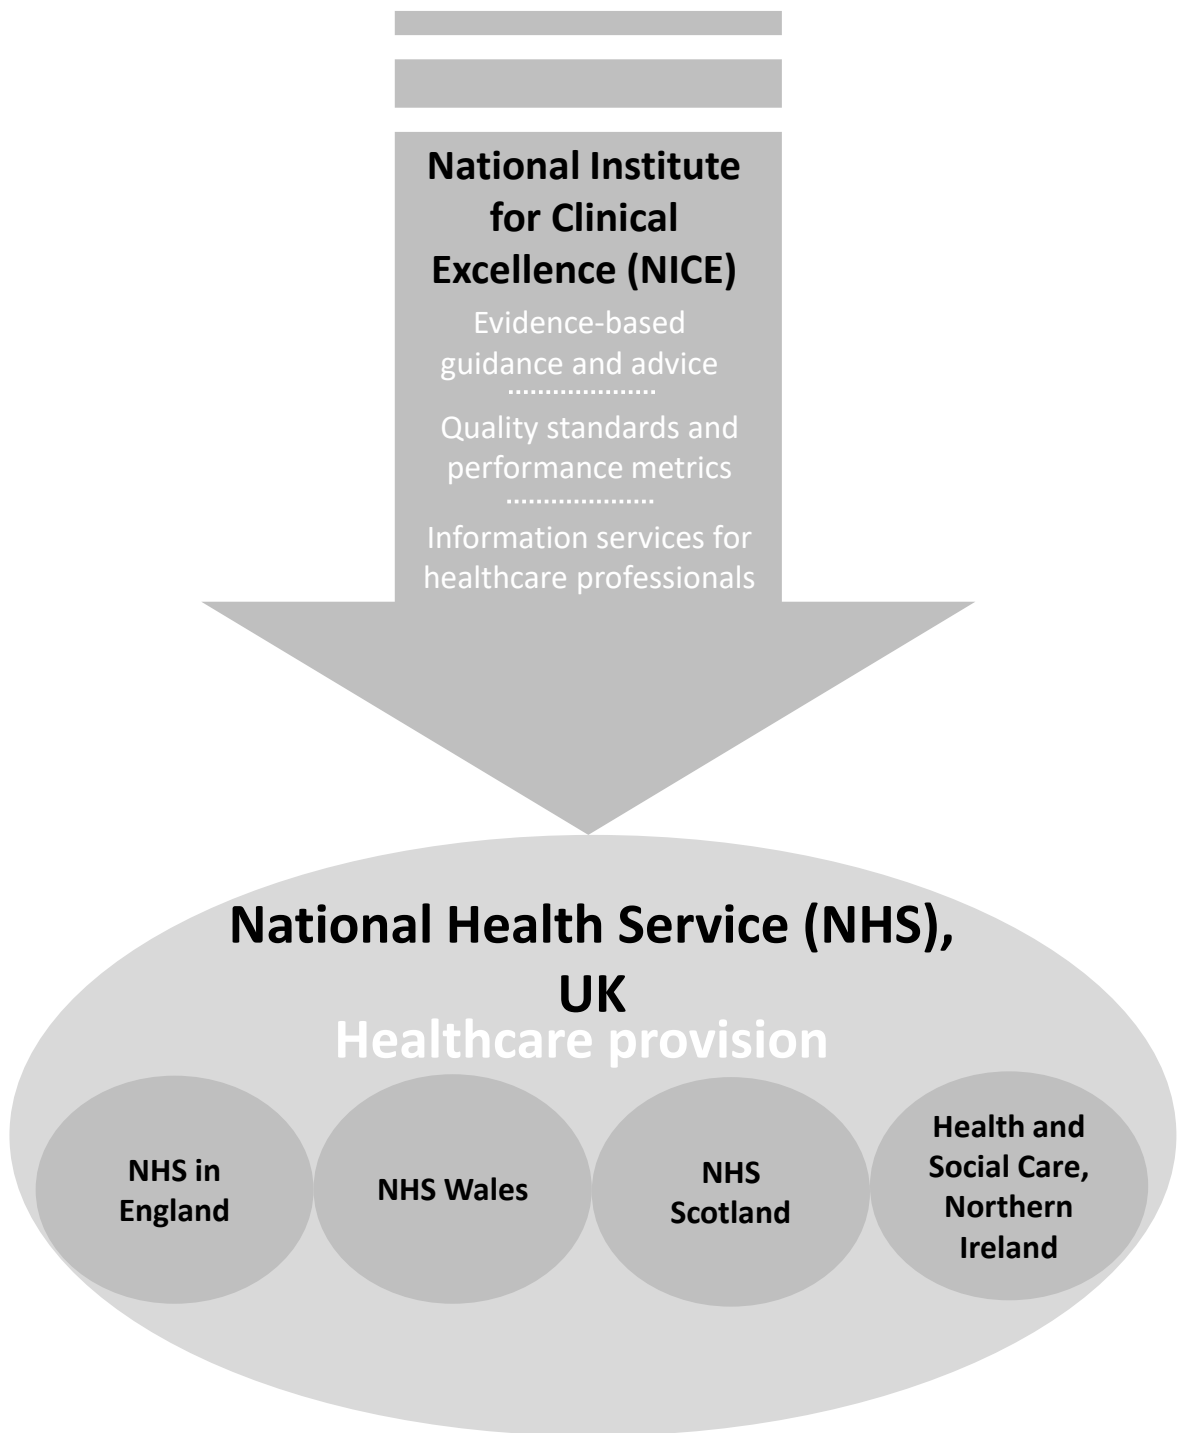

Supplement: bmjopen-2019-029963supp001.pdf [file bmjopen-2019-029963supp001.pdf]
