# Supplementary material for: Introduction and adoption of innovative invasive procedures and devices in the NHS: an in-depth analysis of written policies and qualitative interviews (the INTRODUCE study protocol)
Source: PubMed Central journal article supplement (PMC6719760; doi:10.1136/bmjopen-2019-029963), 2019-08-26
Supplement: bmjopen-2019-029963supp002.pdf [file bmjopen-2019-029963supp002.pdf]

## Supplementary file 2. Preliminary data extraction form

| DATA EXTRACTION DETAILS |                                                                               |                             |
|-------------------------|-------------------------------------------------------------------------------|-----------------------------|
|                         |                                                                               |                             |
| <b>1</b>                | <b>Who is extracting the data? (initials)</b>                                 |                             |
|                         | [ ][ ][ ]                                                                     |                             |
|                         |                                                                               |                             |
| <b>2</b>                | <b>What is the name of the trust?</b>                                         |                             |
|                         |                                                                               |                             |
| <b>3</b>                | <b>What is the Trust ID?</b>                                                  |                             |
|                         | [ ][ ][ ]                                                                     |                             |
|                         |                                                                               |                             |
| <b>4</b>                | <b>Policy title:</b>                                                          |                             |
|                         |                                                                               |                             |
| <b>5</b>                | <b>Current policy and/or version number:</b>                                  |                             |
|                         | [ ][ ][ ]                                                                     |                             |
|                         |                                                                               |                             |
| SCOPE OF POLICY         |                                                                               |                             |
| <b>1</b>                | <b>What procedures/devices does the policy apply to?</b>                      |                             |
| <b>a)</b>               | <b>Invasive procedures</b>                                                    |                             |
|                         | <input type="checkbox"/> Yes                                                  | <input type="checkbox"/> No |
|                         | <input type="checkbox"/> N/A                                                  |                             |
|                         | <i>If yes, answer i) - ii). If no or not stated go to question b).</i>        |                             |
|                         | <b>i) What term is used to describe these procedures?</b>                     |                             |
|                         |                                                                               |                             |
|                         | <b>ii) Does the policy define invasive procedures (or similar term used)?</b> |                             |
|                         | <input type="checkbox"/> Yes                                                  | <input type="checkbox"/> No |
|                         | If yes -                                                                      |                             |
|                         | • Copy and paste definition:                                                  |                             |
|                         |                                                                               |                             |
| <b>b)</b>               | <b>Invasive devices</b>                                                       |                             |
|                         | <input type="checkbox"/> Yes                                                  | <input type="checkbox"/> No |
|                         | <input type="checkbox"/> N/A                                                  |                             |
|                         | <i>If yes answer i)-iv). If no or not stated go to c).</i>                    |                             |
|                         | <b>i) What term is used to describe invasive devices?</b>                     |                             |
|                         |                                                                               |                             |
|                         | <b>ii) Does the policy define invasive devices (or similar term used)?</b>    |                             |
|                         | <input type="checkbox"/> Yes                                                  | <input type="checkbox"/> No |
|                         | If yes -                                                                      |                             |
|                         | • Copy and paste definition:                                                  |                             |
|                         |                                                                               |                             |

|           |                                                                                                                                              |                             |  |
|-----------|----------------------------------------------------------------------------------------------------------------------------------------------|-----------------------------|--|
|           |                                                                                                                                              |                             |  |
| <b>2</b>  | <b>When should the policy be implemented?</b>                                                                                                |                             |  |
| <b>a)</b> | <b>When procedures/devices are new (or a similar term that implies this)?</b>                                                                |                             |  |
|           | <input type="checkbox"/> Yes (explicitly states that the policy should be implemented in this instance)                                      |                             |  |
|           | <input type="checkbox"/> No (explicitly states that the policy should <u>not</u> be implemented in this instance)                            |                             |  |
|           | <input type="checkbox"/> Unclear                                                                                                             |                             |  |
|           | <input type="checkbox"/> Not stated (does not state whether or not policy should be implemented in this instance)                            |                             |  |
|           | <i>If yes, no or unclear answer i)-iii). If not stated go to b).</i>                                                                         |                             |  |
|           | <b>i) Does the policy define 'new' (or similar term)?</b>                                                                                    |                             |  |
|           | <input type="checkbox"/> Yes                                                                                                                 | <input type="checkbox"/> No |  |
|           |                                                                                                                                              |                             |  |
| <b>b)</b> | <b>When procedures/devices are modified (to include references to 'changes in clinical practice') (or a similar term that implies this)?</b> |                             |  |
|           | <input type="checkbox"/> Yes (explicitly states that the policy should be implemented in this instance)                                      |                             |  |
|           | <input type="checkbox"/> No (explicitly states that the policy should <u>not</u> be implemented in this instance)                            |                             |  |
|           | <input type="checkbox"/> Unclear                                                                                                             |                             |  |
|           | <input type="checkbox"/> Not stated (does not state whether or not policy should be implemented in this instance)                            |                             |  |
|           | <i>If yes, no or unclear answer i)-iii). If not stated go to c).</i>                                                                         |                             |  |
|           | <b>i) Does the policy define 'modification' (or similar term)?</b>                                                                           |                             |  |
|           | <input type="checkbox"/> Yes                                                                                                                 | <input type="checkbox"/> No |  |
|           |                                                                                                                                              |                             |  |
| <b>c)</b> | <b>When a procedure/device is used within a research study</b>                                                                               |                             |  |
|           | <input type="checkbox"/> Yes (explicitly states that the policy should be implemented in this instance)                                      |                             |  |
|           | <input type="checkbox"/> No (explicitly states that the policy should <u>not</u> be implemented in this instance)                            |                             |  |
|           | <input type="checkbox"/> Unclear                                                                                                             |                             |  |
|           | <input type="checkbox"/> Not stated (does not state whether or not policy should be implemented in this instance)                            |                             |  |
|           | i) Copy and paste all text: (if none, type N/A) [QUALITATIVE DATA]                                                                           |                             |  |
|           |                                                                                                                                              |                             |  |
| <b>d)</b> | <b>When procedures/devices approved by research ethics are used outside of the specified protocol</b>                                        |                             |  |
|           | <input type="checkbox"/> Yes (explicitly states that the policy should be implemented in this instance)                                      |                             |  |
|           | <input type="checkbox"/> No (explicitly states that the policy should <u>not</u> be implemented in this instance)                            |                             |  |

|                                        |                                                                                                                                                              |                             |                                  |
|----------------------------------------|--------------------------------------------------------------------------------------------------------------------------------------------------------------|-----------------------------|----------------------------------|
|                                        | <input type="checkbox"/> Unclear                                                                                                                             |                             |                                  |
|                                        | <input type="checkbox"/> Not stated (does not state whether or not policy should be implemented in this instance)                                            |                             |                                  |
|                                        | i) Copy and paste all text: (if none, type N/A) [QUALITATIVE DATA]                                                                                           |                             |                                  |
|                                        |                                                                                                                                                              |                             |                                  |
| <b>e)</b>                              | <b>Other. Please state any other instances in which the policy should be implemented (if none, type N/A):</b>                                                |                             |                                  |
|                                        |                                                                                                                                                              |                             |                                  |
|                                        |                                                                                                                                                              |                             |                                  |
| <b>PATIENT INFORMATION AND CONSENT</b> |                                                                                                                                                              |                             |                                  |
|                                        |                                                                                                                                                              |                             |                                  |
| <b>1</b>                               | <b>Does the policy state that patients should receive information and/or complete a consent form that is specific to the new procedure/device delivered?</b> |                             |                                  |
|                                        | <input type="checkbox"/> Yes                                                                                                                                 | <input type="checkbox"/> No | <input type="checkbox"/> Unclear |
|                                        | <i>If yes or unclear answer a)-c). If no go to section I.</i>                                                                                                |                             |                                  |
| <b>a)</b>                              | <b>Is the applicant required to submit the patient information leaflet and/or consent form with the application?</b>                                         |                             |                                  |
|                                        | <input type="checkbox"/> Yes                                                                                                                                 | <input type="checkbox"/> No | <input type="checkbox"/> Unclear |
|                                        |                                                                                                                                                              |                             |                                  |
| <b>b)</b>                              | <b>Does the policy provide guidance on what details should be included in the patient information leaflet and/or consent form?</b>                           |                             |                                  |
|                                        | <input type="checkbox"/> Yes                                                                                                                                 | <input type="checkbox"/> No | <input type="checkbox"/> Unclear |
|                                        | <i>If yes, answer i). If no or unclear go to section I.</i>                                                                                                  |                             |                                  |
|                                        | <b>i) Does this include informing patients that the procedure/device is new/modified?</b>                                                                    |                             |                                  |
|                                        | <input type="checkbox"/> Yes                                                                                                                                 | <input type="checkbox"/> No | <input type="checkbox"/> Unclear |
|                                        |                                                                                                                                                              |                             |                                  |
| <b>c)</b>                              | <b>Does the policy state that specific PIL information should be provided for all approved procedures/devices?</b>                                           |                             |                                  |
|                                        | Yes - specific PIL information should be provided for all new procedures/devices.                                                                            |                             |                                  |
|                                        | No - specific PIL information is only required in a subset of new procedures/devices (i.e. if there is no NICE Guidance in place).                           |                             |                                  |
|                                        | Not stated                                                                                                                                                   |                             |                                  |
|                                        |                                                                                                                                                              |                             |                                  |
| <b>AUDIT AND OUTCOME MONITORING</b>    |                                                                                                                                                              |                             |                                  |
|                                        |                                                                                                                                                              |                             |                                  |
| <b>1</b>                               | <b>Does the policy state that the use of new procedures/devices should be monitored/reviewed in any way?</b>                                                 |                             |                                  |
|                                        | <input type="checkbox"/> Yes                                                                                                                                 | <input type="checkbox"/> No | <input type="checkbox"/> N/A     |
|                                        | <i>If yes, go to question 2. If no or not stated go to section H.</i>                                                                                        |                             |                                  |
|                                        |                                                                                                                                                              |                             |                                  |
|                                        |                                                                                                                                                              |                             |                                  |
| <b>2</b>                               | <b>Does the policy require applicants to submit outcome data, including adverse events, clinical complications etc?</b>                                      |                             |                                  |

|                                                                                                                                                 |                             |                                  |
|-------------------------------------------------------------------------------------------------------------------------------------------------|-----------------------------|----------------------------------|
| <input type="checkbox"/> Yes                                                                                                                    | <input type="checkbox"/> No | <input type="checkbox"/> Unclear |
| <i>If yes, answer a)-d). If no or unclear go to question 4.</i>                                                                                 |                             |                                  |
| <b>a) Who is responsible for submitting monitoring/outcome data? (tick all that apply)</b>                                                      |                             |                                  |
| <input type="checkbox"/> Individual clinician                                                                                                   |                             |                                  |
| <input type="checkbox"/> Head of department                                                                                                     |                             |                                  |
| <input type="checkbox"/> Other. Please state:                                                                                                   |                             |                                  |
| <input type="checkbox"/> Not stated                                                                                                             |                             |                                  |
| <b>b) Who is the monitoring/outcome data submitted too? (tick all that apply)</b>                                                               |                             |                                  |
| <input type="checkbox"/> Trust committee responsible for the introduction of new procedures/devices                                             |                             |                                  |
| <input type="checkbox"/> NICE                                                                                                                   |                             |                                  |
| <input type="checkbox"/> Audit & Effectiveness Dept/Group                                                                                       |                             |                                  |
| <input type="checkbox"/> Clinical effectiveness/safety group                                                                                    |                             |                                  |
| <input type="checkbox"/> Clinical audit group                                                                                                   |                             |                                  |
| <input type="checkbox"/> Medical and/or Nursing Director                                                                                        |                             |                                  |
| <input type="checkbox"/> Clinical governance group                                                                                              |                             |                                  |
| <input type="checkbox"/> Other. Please state:                                                                                                   |                             |                                  |
| <input type="checkbox"/> Not stated                                                                                                             |                             |                                  |
| <b>c) Does the policy specify the type of monitoring/outcome data to be submitted?</b>                                                          |                             |                                  |
| <input type="checkbox"/> Yes                                                                                                                    | <input type="checkbox"/> No |                                  |
| <i>If yes, answer i)-ii). If no go to question d).</i>                                                                                          |                             |                                  |
| <b>i) Which of the following outcomes are specified? (tick all that apply)</b>                                                                  |                             |                                  |
| <input type="checkbox"/> Adverse events                                                                                                         |                             |                                  |
| <input type="checkbox"/> Safety                                                                                                                 |                             |                                  |
| <input type="checkbox"/> Effectiveness                                                                                                          |                             |                                  |
| <input type="checkbox"/> Cost related outcomes                                                                                                  |                             |                                  |
| <input type="checkbox"/> Near misses                                                                                                            |                             |                                  |
| <input type="checkbox"/> Patient Experience/PROMS                                                                                               |                             |                                  |
| <input type="checkbox"/> Other. Please state:                                                                                                   |                             |                                  |
| <b>3 When does the policy state that the procedure should be reviewed/outcome data submitted?</b>                                               |                             |                                  |
| <input type="checkbox"/> After a certain length of time. <i>If selected answer a).</i>                                                          |                             |                                  |
| <input type="checkbox"/> After a certain number of cases. <i>If selected answer b).</i>                                                         |                             |                                  |
| <input type="checkbox"/> This is decided on a case by case basis or according to level of approval/recommendation given by the committee/group. |                             |                                  |
| <input type="checkbox"/> Unclear. <i>If selected answer c)</i>                                                                                  |                             |                                  |
| <b>a) How many months?</b>                                                                                                                      |                             |                                  |
| [ ] [ ] [ ] [ ] [ ]                                                                                                                             |                             |                                  |
| <i>Go to question 6</i>                                                                                                                         |                             |                                  |
| <b>b) How many cases?</b>                                                                                                                       |                             |                                  |

|                         |                                                                                                                                                                                                                     |                             |                                  |
|-------------------------|---------------------------------------------------------------------------------------------------------------------------------------------------------------------------------------------------------------------|-----------------------------|----------------------------------|
|                         | [ ] [ ] [ ] [ ]                                                                                                                                                                                                     |                             |                                  |
|                         | <i>Go to question 6</i>                                                                                                                                                                                             |                             |                                  |
|                         |                                                                                                                                                                                                                     |                             |                                  |
|                         | <b>c) Copy and paste text:</b>                                                                                                                                                                                      |                             |                                  |
|                         |                                                                                                                                                                                                                     |                             |                                  |
| <b>4</b>                | <b>Does the policy outline when the procedure/device may be used in clinical practice without continuing review via this policy? (ie. when the procedure/device can be adopted in to routine clinical practice)</b> |                             |                                  |
|                         | <input type="checkbox"/> Yes                                                                                                                                                                                        | <input type="checkbox"/> No | <input type="checkbox"/> Unclear |
|                         | <i>If yes or unclear, answer a). If no go to question 8.</i>                                                                                                                                                        |                             |                                  |
|                         | <b>a) Copy and paste text:</b>                                                                                                                                                                                      |                             |                                  |
|                         |                                                                                                                                                                                                                     |                             |                                  |
| <b>5</b>                | <b>Does the policy outline when or why the use of a new procedure may be stopped/abandoned/immediately reported to MD?</b>                                                                                          |                             |                                  |
|                         | <input type="checkbox"/> Yes                                                                                                                                                                                        | <input type="checkbox"/> No | <input type="checkbox"/> Unclear |
|                         | <i>If yes or unclear, answer a). If no go to section H.</i>                                                                                                                                                         |                             |                                  |
|                         | <b>a) Copy and paste text:</b>                                                                                                                                                                                      |                             |                                  |
|                         |                                                                                                                                                                                                                     |                             |                                  |
| <b>ADDITIONAL NOTES</b> |                                                                                                                                                                                                                     |                             |                                  |
|                         |                                                                                                                                                                                                                     |                             |                                  |
| <b>1</b>                | <b>Please record any additional comments here. These may relate to data extraction or may be reflections on the policy.</b>                                                                                         |                             |                                  |
|                         |                                                                                                                                                                                                                     |                             |                                  |
